1 **Consumption of a high energy density diet triggers microbiota dysbiosis,**  
2 **hepatic lipidosis, and microglia activation in the nucleus of the solitary tract in**  
3 **rats.**

4 Dulce M. Minaya<sup>1</sup>, Anna Turlej<sup>1</sup>, Abhinav Joshi<sup>1</sup>, Tamas Nagy<sup>2</sup>, Patricia Di Lorenzo<sup>3</sup>, Andras  
5 Hajnal<sup>4</sup>, Krzysztof Czaja<sup>1</sup>

6  
7 <sup>1</sup>Department of Veterinary Biosciences and Diagnostic Imaging, University of Georgia. Athens,  
8 GA, 30602

9 <sup>2</sup>Department of Pathology, University of Georgia, Athens, GA, 30602

10 <sup>3</sup>Department of Psychology, Binghamton University, Binghamton, NY

11 <sup>4</sup>Department of Neural and Behavioral Sciences, the Pennsylvania State University, College of  
12 Medicine, Hershey, PA

13

14

15

16 **Corresponding author:**

17 Krzysztof Czaja, DVM, Ph.D.

18 Department of Veterinary Biosciences & Diagnostic Imaging, The University of Georgia College  
19 of Veterinary Medicine, 501 D.W. Brooks Drive, Athens, GA 30602, United States, Phone: 706-  
20 542-8310, [czajak@uga.edu](mailto:czajak@uga.edu)

21

22

23

24

25

26

27

28

29

30

31

32 **Abstract**

33 Obesity is a multifactorial chronic inflammatory disease. Consumption of high energy density  
34 (ED) diets is associated with hyperphagia, increased body weight and body fat accumulation, and  
35 obesity. Our lab has previously shown that short-term (4 weeks) consumption of a high ED diet  
36 triggers gut microbiota dysbiosis, gut inflammation, and reorganization of the gut-brain vagal  
37 communication. The aim of the current study was to investigate the effect of long-term (6  
38 months) consumption of high ED diet on body composition, gut microbiome, hepatocellular  
39 lipidosis, microglia activation in the Nucleus of the Solitary Tract, and the development of  
40 systemic inflammation. Male Sprague-Dawley rats were fed a low ED diet (5% fat) for two  
41 weeks and then switched to a high ED (45% fat) diet for 26 weeks. Twenty-four hour food  
42 intake, body weight, and body composition were measured twice a week. Blood serum and fecal  
43 samples were collected at baseline, and 1, 4, 8, and 26 weeks after introduction of the high ED  
44 diet. Serum samples were used to measure insulin, leptin, and inflammatory cytokines using  
45 Enzyme-linked Immunosorbent Assay. Fecal samples were used for 16S rRNA genome  
46 sequencing. High ED diet induced microbiota dysbiosis within a week of introducing the diet. In  
47 addition, there was significant microglia activation in the intermediate NTS and marked hepatic  
48 lipidosis after four weeks of high ED diet. We further observed changes in the serum cytokine  
49 profile after 26 weeks of high ED feeding. These data suggest that microbiota dysbiosis is the  
50 first response of the organism to high ED diets and this, in turn, detrimentally affects liver fat  
51 accumulation, microglia activation in the brain, and circulating levels of inflammatory markers.

52

53

54 *Key words:* High energy density diet, high fat diet, microbiome, gut dysbiosis, leptin, cytokines,  
55 hepatic steatosis, microglia, vagus

## 56 1. Introduction

57 Obesity has been widely recognized as a low-grade, chronic inflammatory disease. However,  
58 the causal relationship between inflammation and obesity, and the causal factors behind obesity-  
59 dependent inflammation are not well understood. Inflammation is a transient physiological  
60 response of an organism to reinstate homeostasis in response to a, typically harmful, stimuli. The  
61 inflammatory state that accompanies the metabolic syndrome observed in most obese  
62 individuals, however, is not transient.

63 Consumption of high energy density (ED) diets, including diets high in sugar, and/or in fat  
64 have been shown to trigger microbiota dysbiosis, increased body fat accumulation, and  
65 development of metabolic syndrome<sup>1,2</sup>. The vast majority of obesity cases result from an  
66 imbalance between energy intake and energy expenditure, with intake surpassing expenditure.  
67 The excess energy consumed is taken up and stored as adipose tissue. Once thought to be inert  
68 tissue, adipose tissue is now recognized as a metabolically active endocrine organ regulating  
69 physiological and pathological processes<sup>3</sup>. Some of the hormones, adipokines, and cytokines, e.g  
70 IL-6, TNF- $\alpha$ , released by adipose tissue have pro-inflammatory or anti-inflammatory effects.

71 Excess energy intake leads to enlargement of adipose tissue depositions. This enlargement  
72 occurs through an increase in the number of adipocytes (adipogenesis) or an increase in the size  
73 of existing adipocytes (hypertrophy)<sup>4</sup>. In the *db/db* mouse model, it has been shown that in the  
74 early stages of obesity development, there is a high number of adipogenic/angiogenic cell  
75 clusters. The number of these cell clusters declines as time goes by and there is an increase in the  
76 number of crown-like structures, which are hallmarks of local infiltration of macrophages into  
77 tissue surrounding dead adipocytes<sup>5</sup>. Using three independent adipocyte-specific anti-  
78 inflammatory mouse models, Asterholm *et al.* showed that an acute inflammatory response in  
79 adipose tissue is necessary to stimulate adipogenesis as well as proper remodeling and

80 angiogenesis of the extracellular matrix, to allow for healthy adipose tissue expansion<sup>6</sup>. It would  
81 appear that the tonic activation of the innate immune system induced by excess energy intake  
82 gradually disrupts the homeostatic state of metabolic processes, triggering a chronic  
83 inflammatory state.

84 Studies have shown that in the obese state, the production of pro-inflammatory adipokines  
85 like TNF $\alpha$  and IL-6 induce resident macrophages to change their phenotype from surveillance  
86 “M2” to pro-inflammatory “M1” as well as trigger recruitment of M1 macrophages<sup>7, 8</sup>. In  
87 addition, it has been reported that free fatty acids activate Toll-like receptor (TLR) 4, a pattern  
88 recognition receptor expressed on innate immune system cells, in adipose tissue to generate pro-  
89 inflammatory signals<sup>9, 10</sup>. Moreover, deletion of TLR5, highly expressed in the intestinal mucosa  
90 and thought to help fight against infections, triggered a shift in the species composition of the gut  
91 microbiota that is associated with development of metabolic syndrome in mice<sup>11</sup>. Previous work  
92 from our laboratory has shown that four weeks of high ED diet consumption is sufficient to  
93 trigger significant activation of microglia, resident macrophages in the brain, in the Nucleus of  
94 the Solitary Tract (NTS) – first relay point for satiety signals arising from the gut<sup>12</sup>.

95 Another obesity comorbidity is Non-alcoholic Fatty Liver Disease (NAFLD). NAFLD is a  
96 condition frequently found among people with diabetes (50%) and obesity (76%), and it is  
97 almost universal among diabetic people who are morbidly obese<sup>13</sup>. It refers to a wide spectrum of  
98 liver damage, ranging from simple steatosis to steatohepatitis, advanced fibrosis, and cirrhosis  
99 that occurs in people who drink little to no alcohol. This disease is the most common chronic  
100 liver condition in the Western world<sup>14</sup>. Hepatocytes play a primary role in lipid metabolism.  
101 Free fatty acids (FFAs) enter the hepatocyte and the majority of the FFAs are esterified to form  
102 triglycerides (TGs). A smaller fraction of FFAs are used to synthesize cholesterol esters or

103 phospholipids, or broken down to produce ketone bodies. TGs are complexed with an  
104 apolipoprotein to form lipoproteins and then are exported from the hepatocyte. The  
105 apolipoproteins are synthesized by the hepatocyte and this is the rate limiting step in TG export.  
106 Interference with any of the steps above can result in accumulation of intracellular lipid (hepatic  
107 lipidosis). When consuming a high ED diet, the usual cause of hepatic lipidosis is the increased  
108 production of TGs which outpaces apolipoprotein production<sup>15</sup>.

109 Therefore, the aim of this study was to study the systemic responses to long-term  
110 consumption of a high ED diet. We tested the hypotheses that high ED diet consumption induces  
111 progressive microbiota dysbiosis and increases body weight, body fat accumulation, and  
112 circulating levels of leptin, insulin, and pro-inflammatory cytokines. In addition, we  
113 hypothesized that high ED diet consumption induces NAFLD and increases microglia activation  
114 in the Nucleus of the Solitary Tract (NTS).

115

## 116 **2. Methods**

117

### 118 **2.1 Animals**

119 Male Sprague-Dawley rats (n = 15; ~300g; Envigo, Indianapolis, IN) were housed  
120 individually in conventional polycarbonate shoe-box cages in a temperature-controlled vivarium  
121 with ad libitum access to standard pellets of rat chow (PicoLab rodent diet 20, product #5053,  
122 Fort Worth, TX) and water. Rats were maintained on a 12:12-h light: dark cycle with lights on at  
123 0700-h and allowed to acclimate to laboratory conditions for one week prior to starting  
124 experiments. All animal procedures were approved by the University of Georgia Institutional  
125 Animal Care and Use Committee and conformed to National Institutes of Health Guidelines for  
126 the Care and Use of Laboratory Animals.

127

## 128        **2.2 Food Intake, body weight, and body composition**

129        Following the acclimation period, rats were maintained on standard chow for an additional  
130 two weeks. The animals were then switched to a high energy density (ED) diet (45% calories  
131 from fat, Research Diet #D12451, New Brunswick, NJ). Twenty-four hour food intake was  
132 measured twice a week for the duration of the study. Briefly, pre-weighed food (~ 50 g) was  
133 provided in standard stainless-steel hoppers. Twenty-four hours later, the amount of food  
134 remaining in the food hopper and all spillage was recorded. Body weight and body composition  
135 were measured weekly. A Minispec LF 110 BCA Analyzer (Bruker Corp., The Woodlands, TX)  
136 was used to measure body composition in minimally restrained, non-anesthetized animals. The  
137 Minispec is a body composition analyzer based on time-domain nuclear magnetic resonance  
138 technology, which provides absolute masses for fat, lean tissue, and water <sup>16</sup>. Six rats were  
139 sacrificed after being on the high ED diet for four weeks (short-term ED, or STED group). The  
140 remaining nine rats were maintained on the high ED diet for a total of 26 weeks (long-term ED,  
141 or LTED group). An additional aged-matched, standard chow fed group of rats (n = 9, LF26)  
142 served as the end-point controls for the LTED group.

## 143        **2.3 Cytokines, Leptin, and Insulin levels in serum**

144        Blood samples were collected on the last day of standard chow and 4, 8, and 26 weeks after  
145 introduction of the high ED diet. Blood was collected from the lateral saphenous vein and  
146 allowed to coagulate in the vial. After one hour, the blood was centrifuged at 10,000 rpm for five  
147 minutes. The serum was collected and stored at -21°C. A cytokine array (Rat Cytokine ELISA  
148 Kit, cat #EA-4006, Signosis Inc., Sunnyvale, CA) was used, according to manufacturer's  
149 instructions, to compare levels of cytokines and chemokines at each time point. Insulin levels  
150 were determined using the Rat Insulin ELISA kit (cat #80-INSRT-E01; ALPCO Diagnostics,  
151 Inc., Salem, NH) following manufacturer's instructions.

## 152        **2.4 Microbiome analysis**

153        Fecal samples were collected following the same timeline as for blood samples mentioned  
154 above. Bacterial DNA was extracted from feces using a commercial kit following manufacturer's  
155 instructions (Quick-DNA Fecal/Soil Microbe Miniprep Kit, cat #D6010, Zymo research, Irvine,  
156 CA). The eluted DNA was sent to the Georgia Genomics and Bioinformatics Core at the  
157 University of Georgia for sequencing. High throughput sequencing was performed using  
158 Illumina MiSeq paired-end runs. Amplification targeted the V3-V4 region of the 16S ribosomal  
159 RNA genes using the following primers: S-D-Bact-041-b-S-17 (5'-  
160 CCTACGGGNGGCWGCAG-3') forward and S-D-Bact-0785-a-A-21 (5'-  
161 GACTACHVGGGTATCTAATCC-3')<sup>17</sup>. Sequences were subsequently trimmed, joined, and  
162 quality filtered. To identify Operational Taxonomic Units (OTUs) and to evaluate beta  
163 (community diversity divergence between samples) and alpha (microbial diversity within  
164 sample) diversities, we used the Quantitative Insights Into Microbial Ecology (QIIME) software  
165 package<sup>18</sup>. Linear discriminant analysis to identify taxa with differentiating abundance was  
166 conducted using the LDA Effect Size (LEfSe) algorithm<sup>19</sup>. Bacterial abundance was normalized  
167 by log-transformation, and statistical analysis and principal component analysis (clustering) were  
168 performed using the METAGENassist platform<sup>20</sup>.

## 169        **2.5 Euthanasia and tissue processing**

170        Rats were anesthetized with CO<sub>2</sub> and transcardially perfused with 0.1 M phosphate-buffered  
171 saline (PBS; pH 7.4) followed by 4% paraformaldehyde. Hindbrains and liver were harvested,  
172 post-fixed in 4% paraformaldehyde for 2-h, and immersed in 30% sucrose and 0.1% NaN<sub>3</sub>  
173 (Sigma-Aldrich; pH 7.4) in PBS and stored at 4°C until processing.

174

175        **2.6 Microglia activation**

176        Hindbrains were cryosectioned (Leica CM1950, Leica Biosystems, Wetzlar, Germany) at 20  
177         $\mu\text{m}$  thickness and standard immunofluorescence was used to determine microglia activation in  
178        the hindbrain. Hindbrain sections were incubated overnight with a primary antibody against  
179        ionized calcium binding adaptor molecule 1 (Iba1, Wako Cat#019-19741, RRDI: AB\_839504)  
180        followed by Alexa-488 secondary antibody for 2-h to visualize microglia activation as previously  
181        described<sup>21</sup>. Sections were mounted in ProLong (Molecular Probes, OR) and examined under a  
182        Nikon 80-I fluorescent microscope. The area fraction of Iba1 was analyzed using Nikon  
183        Elements AR software as previously described<sup>22, 23</sup>.

184        **2.7 Hepatic Lipidosis**

185        After fixation, liver samples collected from the right median lobe were trimmed, processed,  
186        and embedded in paraffin. Paraffin blocks were then cryosectioned at 4  $\mu\text{m}$  thickness and the  
187        tissue sections were stained with hematoxylin and eosin (H&E) for intrahepatic lipid content  
188        assessment. H&E stained liver sections were examined microscopically by a board-certified  
189        veterinary pathologist using an Olympus BX41 upright light microscope.

190        In addition, samples for Oil-Red-O (ORO) staining were embedded in Optimum Cutting  
191        Temperature (OCT) compound (VWR Inc., Atlanta, GA) and were cryosectioned at 7  $\mu\text{m}$   
192        thickness. Tissue sections were mounted on positively charged slides, stained with ORO stain  
193        (Polysciences Inc., Warrington, PA), and coverslipped. Histological images were captured using  
194        an Olympus DP25 digital camera controlled by Olympus cellSense Standard software at 200x  
195        and 400x original magnification (Olympus, Shinjuku, Japan). A semi-quantitative grading scale  
196        (normal [0], minimal [1], mild [2], moderate [3], and marked [4]) was used to express the extent  
197        of hepatic lipidosis<sup>24</sup>. In addition, ORO staining was quantified by Nikon Elements AR



198 Software. A threshold was determined to isolate the ORO stain from the background. The  
199 threshold settings for 200x were determined as R: 145-255, G: 0-129, B: 2-255, circularity: 0-1,  
200 and size: 0-92. Random systematic sampling was completed by drawing five 600 x 600 pixel  
201 squares, using the square ROI tool, on the image. The squares were arranged in a manner  
202 resembling non-overlapping Olympic rings. The sampling was completed so the squares were  
203 randomly assigned to areas uninterrupted by empty space (sinusoids). Binary area fraction was  
204 calculated as previously described<sup>23</sup> and averaged from the five squares. These averages were  
205 then compared between groups to analyze changes in hepatic lipidosis.

## 206 **2.8 Statistical analysis**

207 GraphPad Prism 7 (GraphPad Software, Inc.) was used to conduct statistical analyses. Data are  
208 expressed as mean  $\pm$  SD and were analyzed using t-test or ANOVA followed by Holm-Sidak  
209 multiple comparisons test as appropriate. Alpha value for statistical significance was set at 0.05.

210

## 211 **3. Results**

### 212 **3.1 High energy density (ED) diet consumption significantly increased body weight and body** 213 **fat mass**

214 Group means for caloric intake, body weight, and body fat mass were compared using one-  
215 way ANOVA to evaluate the effect of short term (STED) and long term (LTED) consumption of  
216 a high ED diet (Fig. 1). In the STED group, the animals significantly increased their caloric  
217 intake during the first week after introduction of the high ED diet compared to intake of the low  
218 ED diet ( $P_s < 0.0001$ ) [Fig. 1-A]. Caloric intake decreased to intakes of the low ED by week two  
219 and remained stable. After two weeks of high ED diet consumption, the animals were  
220 significantly heavier than at baseline ( $P < 0.01$ ) [Fig. 1-B]. After four weeks on the high ED diet,

221 rats were still significantly heavier than after week one on the diet ( $P = 0.007$ ). Consistently,  
222 body fat mass percent significantly increased after only one week on the high ED diet compared  
223 to baseline ( $P_s < 0.05$ ) and remained high in spite of the decrease in caloric intake [Fig.1-C].

224 Similar results were observed in the LTED group. Caloric intake was significantly higher  
225 during the first week of high ED diet consumption compared to intake of low ED diet and all  
226 subsequent weeks on high ED diet ( $P < 0.0001$ ) [Fig. 1-D]. Body weight was significantly higher  
227 after two weeks of high ED diet compared to baseline ( $P = 0.037$ ), and the animals continued to  
228 gain weight steadily for the remainder of the study [Fig. 1-E]. Body fat percent was significantly  
229 higher after two weeks on the high ED diet compared to baseline ( $P < 0.0001$ ) and fat deposits  
230 continued to grow throughout the experiment [Fig. 1-F].

231 Furthermore, caloric intake of the LTED group at the end of the study (26 weeks of high ED  
232 diet) was similar to that of aged-matched, low ED diet controls (LF26) [Fig. 1-G]. However,  
233 body weight ( $P = 0.006$ ) [Fig. 1-H] and body fat ( $P < 0.0001$ ) [Fig. 1-I] were significantly higher  
234 in high ED fed rats compared to low ED diet controls.

235 **3.2 Long-term high ED diet consumption significantly changed the cytokine profile in serum**

236 Group means  $\pm$  SD serum levels of cytokines (OD) and insulin (ng/ml) were compared to  
237 investigate the impact of short term and long-term consumption of a high ED diet on [Table 1].  
238 In the STED group, the data were compared using paired t-test. We observed a significant  
239 increase in TNF $\alpha$  ( $P = 0.03$ ) and significant decrease in IL-1 $\alpha$  after four weeks on ED diet (ED4)  
240 compared to baseline ( $P < 0.0001$ ). There were no other significant changes observed.

241 In the LTED group, longitudinally (data were compared using RM one-way ANOVA), four  
242 weeks after introduction of the high ED diet we observed a significant increase in FGF $\beta$ , MCP-1,  
243 MIP-1a, and TGF $\beta$  compared to baseline ( $P_s < 0.05$ ). After eight weeks of high ED diet (ED8)

244 consumption, serum levels of IFN $\gamma$  and IL-15 were significantly decreased compared to baseline  
245 (Ps < 0.01). Levels of TNF $\alpha$  and IL-6 were significantly lower than after four weeks on the high  
246 ED diet (Ps < 0.05). After 26 weeks on the high ED diet (ED26), serum levels of FGF $\beta$ , Leptin,  
247 SCF, and MCP-1 were significantly higher than at baseline (Ps < 0.05), ED4 (Ps < 0.01), and  
248 ED8 (Ps < 0.05). IP-10 levels were significantly higher than at ED4 (P = 0.0094). MIP-1 $\alpha$ , IL-  
249 15, and IL-1 $\alpha$  levels were significantly higher than at ED8 (Ps < 0.05). Serum level of Rantes  
250 was significantly lower compared to baseline, ED4, and ED8 (Ps < 0.05). IFN $\gamma$ , IL-5 levels were  
251 significantly lower compared to baseline (Ps < 0.01). Cross-sectional comparison of the ED26  
252 group to low ED diet fed controls using unpaired t-test revealed that the ED26 group had  
253 significantly higher levels of leptin, SCF, IL-1 $\alpha$ , and TGF $\beta$  (Ps < 0.01).

### 254 3.3 Consumption of a high ED diet triggered progressive dysbiosis of the gut microbiota

255 To investigate the effect of consuming a high (ED) diet on the gut microbiota, we  
256 characterized the microbiome of the STED and LTED groups at several time points throughout  
257 the study. In the STED group, we characterized the gut microbiota composition at baseline (LF),  
258 one week (ED1), and four weeks (ED4) after introduction of the high ED diet. The rarefaction  
259 curve of this analysis indicated > 30000 sequences and > 500 operational taxonomic units per  
260 sample [and Supplementary Fig. S1-A]. In the LTED group, we characterized the microbiota  
261 composition at four (ED4), eight (ED8), and 26 (ED26) weeks after high ED diet introduction.  
262 We also characterized the microbiota of the age-matched, low ED diet control group (LF26). The  
263 rarefaction curve of this analysis indicated > 30000 sequences and > 1500 operational  
264 taxonomic units per sample [and Supplementary Fig. S1-B].

265 In the STED group, *Firmicutes* and *Bacteroidetes* were the most abundant phyla and  
266 represented >90% of the bacteria identified. The Shannon index, used to characterize species

267 diversity in a community, revealed that there was a significant decrease in bacteria diversity after  
268 one week of high ED diet consumption compared to baseline ( $P = 0.0146$ ) [Fig. 2-A]. There  
269 were no significant changes observed in bacterial diversity after four weeks of high ED diet  
270 consumption. Principal Component Analysis was used to visualize how different the microbiota  
271 were in each sample and to represent the differences as distance [Fig. 2-B]. At baseline (LF), all  
272 animals clustered together. One week after high ED diet introduction, the animals clustered away  
273 from their baseline (LF) profile. After four weeks of high ED diet consumption, all animals  
274 clustered close to the profile at ED1 and further away from their baseline (LF) profile.

275 Figure 2-C [and Supplementary Fig. S2] represents the microbiota composition of the STED  
276 group at each time point. At baseline (LF), the microbiota is characterized by abundant members  
277 of the *Bacteroidetes* order *Bacteroidales*. One week after high ED diet introduction (ED1), the  
278 microbiota was characterized by abundant members of the *Firmicutes* order *Erysipelotrichales*.  
279 After four weeks of high ED diet, the microbiota was characterized by abundant members of the  
280 *Actinobacteria* order *Actinomycetales* and *Verrucomicrobia* order *Verrucomicrobiales*.

281 Microbiota composition was changed within a week of introduction of high ED diet [Fig. 3-  
282 A]. High ED diet consumption significantly increased the abundance of *Firmicutes* (LF 27% vs  
283 ED1 86% and ED4 69%,  $P_s < 0.0001$ ) and decreased the abundance of *Bacteroidetes* (LF 67%  
284 vs ED1 10% and ED4 16%,  $P_s < 0.0001$ ). There was also a significant increase in abundance of  
285 *Verrucomicrobia* after four weeks of high ED diet (LF 1% and ED1 0.8% vs ED4 8%,  $P = 0.04$ ).  
286 At the level of family, high ED diet consumption significantly increased the abundance of  
287 members of *Erysipelotrichaceae* (LF 3.8% vs ED1 60% and ED4 41%,  $P_s < 0.0001$ ) of the  
288 phylum *Firmicutes*. Members of the family *S24-7* of the phylum *Bacteroidetes* were significantly  
289 depleted by high ED diet consumption (LF 69% vs ED1 12% and ED4 17%,  $P_s < 0.0001$ ). In

290 addition, one week of high ED diet consumption significantly increased the *Firmicutes-to-*  
291 *Bacteroidetes* ratio, (LF 0.4 vs ED1 8.7,  $P = 0.0010$ ). There was no statistically significant  
292 difference after four weeks on the high ED diet, however, the ratio was still higher at ED4 (4.3)  
293 than at baseline (LF) [Fig. 3-B].

294 Similarly, in the long-term group (LTED + LF26), *Firmicutes* and *Bacteroidetes* were the  
295 most abundant phyla and represented >90% of the bacteria identified. The Shannon index  
296 showed no significant difference in bacterial diversity [Fig. 2-D]. Principal Component Analysis  
297 showed that all animals fed the high ED diet clustered together and away from animals fed low  
298 ED diet (LF26) [Fig. 2-E].

299 Figure 2-F [and Supplementary Fig. S3] represents the microbiota composition of the LTED  
300 group at each time point. At ED4, the microbiota was characterized by abundant members of  
301 *Bacteroidetes* order *Bacteroidales* and *Firmicutes* orders *Bacillales* and *Clostridiales*. Eight  
302 weeks after high ED diet introduction (ED8), the microbiota was characterized by abundant  
303 members of the *Bacteroidetes* order *Bacteroidales* and *Firmicutes* orders *Lactobacillales*,  
304 *Turicibacterales*, and *Clostridiales*. After 26 weeks of high ED diet (ED26), the microbiota was  
305 characterized by abundant members of *Bacteroidetes* orders *Bacteroidales*. The microbiota of the  
306 low ED diet control group (LF26) was characterized by abundant members of *Bacteroidetes*  
307 orders *Bacteroidales* and *Flavobacteriales*, and *Firmicutes* order *Clostridiales*.

308 At the level of family [Fig. 3-C], four weeks (ED4) and eight weeks (ED8) after high ED diet  
309 introduction there was a significantly higher abundance of *Ruminococcaceae* compared to after  
310 26 weeks (ED26,  $P < 0.01$ ). Four weeks (ED4) and eight weeks (ED8) after high ED diet  
311 introduction, there was a significantly lower abundance of *Verrucomicrobiaceae* compared to  
312 after 26 weeks (ED26,  $P < 0.01$ ). High ED diet fed rats had significantly higher abundance of

313 members of *Bacteroidaceae* (LF26 0.8% vs ED4 14%, ED8 14%, and ED26 16%,  $P_s < 0.0001$ )  
314 and *Ruminococcaceae* (LF26 0.8% vs ED4 14% and ED8 14%,  $P_s < 0.0001$ ) compared to low  
315 ED fed rats. In addition, high ED diet fed rats had significantly lower abundance of members of  
316 *Peptostreptococcaceae* (LF26 5% vs ED4 0.6%, ED8 0.9%, and ED26 0.5%,  $P_s < 0.05$ ) and  
317 *Verrucomicrobiaceae* (LF26 14% vs ED4 1.2%, ED8 3%, and ED26 9%,  $P_s < 0.01$ ) compared to  
318 low ED fed rats. In high ED fed rats, the *Firmicutes-to-Bacteroidetes* ratio was significantly  
319 higher at eight weeks (ED8) compared to four (ED4) and 26 (ED26) weeks (ED8 11.5 vs ED4  
320 6.4 and ED26 5.7,  $P_s < 0.01$ ). Compared to low ED controls (LF26), high ED fed rats had a  
321 significantly lower *Firmicutes-to-Bacteroidetes* ratio at four weeks (ED4) and 26 weeks (ED26)  
322 (LF26 13% vs ED4 6% and ED26 6%,  $P_s < 0.01$ ) [Fig. 3-D].

323 **3.4 Consumption of a high ED diet significantly increased microglia activation in the NTS**  
324 We hypothesized that high ED diet consumption triggers microglia activation in the NTS.  
325 Results of immunostaining against Iba-1 were compared using one-way ANOVA and revealed  
326 that compared to low ED controls (LF26W), rats fed a high ED diet for four weeks (ED4,  $P =$   
327 0.0005) and 26 weeks (ED26,  $P < 0.0001$ ) had significantly higher binary area fraction of  
328 fluorescent staining against Iba-1 [Fig. 4]. In addition, the ED26 group had significantly higher  
329 binary area fraction of fluorescent staining than the ED4 group ( $P = 0.0213$ ).

330 **3.5 High ED diet consumption induced hepatic lipidosis**

331 A semi-quantitative method of scoring histological images using Kleiner's scoring system was  
332 completed on ORO and H&E stained hepatic sections with the comparative results shown in Fig.  
333 5. We tested the hypothesis that consumption of a high ED diet leads to increased accumulation  
334 of fat in liver tissue. In H&E-stained sections, intracellular lipid is removed during processing  
335 and paraffin embedding. Therefore, round, clear, and distinct vacuoles remain in the cytoplasm

336 of hepatocytes. In ORO-stained sections, lipid is retained during embedding and appears as  
337 intensely red granules or globules in the cytoplasm of hepatocytes. H&E staining revealed an  
338 increase in distinct vacuoles in rats fed the high ED diet (ED4 and ED26) compared to low ED  
339 controls (LF26) [Fig. 5, top row]. Similarly, ORO staining showed that high ED fed animals  
340 exhibited more intensely red granules (ED4 and ED26) than low ED controls (LF26) [Fig. 5,  
341 middle row]. The quantitative scoring of hepatocellular lipidosis confirmed that while animals  
342 fed low ED diet (LF26) did not exhibit signs of hepatocellular lipidosis, hepatocellular lipidosis  
343 was apparent within four weeks of introducing the high ED diet (ED4). There was no significant  
344 difference in hepatocellular lipidosis between the ED4 and ED26 groups [Fig. 5, bottom row  
345 table].

346 We further analyzed the intensity of ORO staining in tissue sections that were scored by the  
347 veterinary pathologist using a computer software (see methods for details) and results were  
348 analyzed using one-way ANOVA. The data revealed that there is a progressive increase in the  
349 surface area covered by lipids with regular chow fed animals showing very little staining (BAF =  
350  $0.0099 \pm 0.01$ ) compared to animals fed the ED diet for four weeks (BAF =  $0.0449 \pm 0.01$ ) and  
351 those fed the ED diet for 26 weeks (BAF =  $0.0629 \pm 0.02$ ). Animals fed the ED diet for 26 weeks  
352 (ED26) had significantly more ORO staining compared to regular chow fed animals (LF26)  
353 [Fig.5, bottom row graph].

#### 354 **4. Discussion**

355 It is widely recognized that diet is a key factor in short-term and long-term composition,  
356 diversity, dynamics, and microbiota-driven host metabolism<sup>25</sup>. In this study, we sought to  
357 characterize the long-term effects of consuming a high energy density (ED) diet on the gut  
358 microbiome, serum profile of inflammation, neural inflammation, and development of non-

359 alcoholic fatty liver disease (NAFLD). Results showed that high ED diet consumption induced  
360 rapid changes in the gut microbiome, triggered inflammation in the NTS as evidenced by  
361 increased microglia activation, induced NAFLD, and changed the serum cytokine profile in rats.

362 Consistent with prior reports<sup>23, 26-28</sup>, our data showed that upon introduction of a high ED  
363 diet, rats significantly increased their caloric intake compared to when fed a low ED diet.  
364 However, by the second week of high ED diet consumption the animals had adjusted their  
365 caloric intake. This adjustment of caloric intake by rats following acclimation to a high ED diet  
366 has been previously reported<sup>23, 29</sup>. In addition, at the 26 week time point, there was no significant  
367 difference in caloric intake between rats fed high ED diet and those fed low ED diet.  
368 Concurrently, the rats fed high ED diet exhibited a significant increase in body weight and fat  
369 mass that became more prominent over time. Rats fed high ED diet had significantly higher final  
370 body weight and fat mass compared to low ED fed animals, despite similar caloric intake. This  
371 was previously reported in a study by Lomba *et al.*, which showed that rats fed a high fat diet  
372 restricted to the amount of calories consumed by a low fat diet fed group gained significantly  
373 more body weight and white adipose tissue than the low fat diet fed group<sup>30</sup>. Given that the  
374 initial increase in calories consumed by high ED diet fed rats was transient, this phenomenon  
375 indicates that high ED diets detrimentally affect body weight and fat mass accumulation  
376 independent of caloric intake.

377 High ED diet consumption induced dynamic fluctuations in the gut microbiota. Consistent  
378 with prior reports from our laboratory<sup>26</sup>, bacterial diversity was significantly decreased within  
379 one week of introducing the high ED diet. This immediate response was ephemeral, similar to  
380 the transient increase in caloric intake observed during the first week of high ED diet  
381 consumption, as we did not detect statistically significant differences in bacterial diversity after



382 four, eight, and 26 weeks of high ED diet consumption. In concert, we observed a similar  
383 fluctuation pattern in bacterial abundance. At the one-week mark after introduction of the high  
384 ED diet, all animals clustered together and away from their baseline profile. After four weeks of  
385 high ED diet consumption, all animals clustered together and away from their baseline and one-  
386 week mark profile. Thereafter, we did not observe further fluctuations in bacterial abundance.  
387 After four, eight, and 26 weeks of high ED diet, all animals clustered together and away from the  
388 profile of animals fed low ED diet.

389 We found that high ED diet consumption led to a rapid increase in members of the family  
390 *Erysipelotrichaceae* belonging to the *Firmicutes* phylum. These are obligate anaerobes have  
391 been previously associated with consumption of high ED diets, increased adiposity and  
392 inflammation<sup>31-33</sup>. High ED diet consumption also depleted members of the family *S24-7*  
393 belonging to the *Bacteroidetes* phylum and members of the family *Verrucomicrobiaceae* of the  
394 *Verrucomicrobia* phylum. The family *S24-7* is associated with gut health as they are primarily  
395 involved in the fermentation of dietary fibers to produce short-chain fatty acids (SCFAs) and  
396 have been previously shown to be depleted by consumption of high fat diets<sup>26, 34-36</sup>. Members of  
397 the family *Verrucomicrobiaceae* have also been shown to produce the SCFA propionate<sup>35</sup>. By  
398 the end of four weeks on the high ED diet, we see a blooming of the family *Ruminococcaceae*  
399 that persists for the duration of the study. Members of this family are also SCFAs producers and  
400 generally associated with gut health<sup>35</sup>.

401 In this study, we aimed to characterize the systemic pattern of leptin, insulin, and pro- and  
402 anti-inflammatory cytokines in rats fed a high ED diet. We observed a significant increase in  
403 serum leptin after consumption of a high ED diet for 26 weeks. We did not observe significant  
404 changes at the earlier time points tested. Consistent with prior reports, we did not observe

405 changes in serum levels of insulin with high ED diet consumption at any of the time points tested  
406 <sup>37-39</sup>. The effect of high ED diet consumption on insulin levels appears to be strain-specific.  
407 Woods *et al.* reported a significant increase in plasma insulin levels in Long-Evans male rats fed  
408 a high fat diet for 70 days<sup>40</sup>. Similar results were reported in WNIN rats after consumption of a  
409 high fat diet for 13 weeks<sup>39</sup> and Wistar rats after 18 weeks<sup>41</sup>.

410 The cytokines showing major differences were Fibroblast Growth Factor (FGF $\beta$ ), Stem Cell  
411 factor (SCF), Interferon  $\gamma$  (IFN $\gamma$ ), Interferon  $\gamma$  induced protein (IP-10), Regulated on activation,  
412 normal T cell expressed and secreted (Rantes), Monocyte Chemoattractant Protein (MCP-1),  
413 Macrophage Inflammatory Protein (MIP-1 $\alpha$ ), Interleukin 1 $\alpha$  (IL-1 $\alpha$ ), and Interleukin 5 (IL-5).  
414 Chemokines, or chemoattractant cytokines, are produced by a host of cell types and play a  
415 significant role in inflammatory processes as they help regulate the traffic of immune cells to  
416 specific sites. Our results revealed a significant increase in MCP-1 and MIP-1 $\alpha$  after 26 weeks of  
417 high ED diet consumption. A similar study by Muralidhar *et al.* reported no change in MIP-1 $\alpha$   
418 and a non-statistically significant increase in MCP-1 after 13 weeks of high fat feeding<sup>39</sup>. The  
419 length of time of high fat/high ED diet consumption likely underlies the differences observed  
420 between the two studies, however, there is an observable trend toward higher levels with high  
421 fat/ high ED diet consumption. In addition, we observed a significant decrease in Rantes,  
422 consistent with a prior report by Fenton *et al.* in mice fed a high fat diet for 10 weeks<sup>42</sup>.

423 SCF serves as a ligand molecule for the receptor tyrosine kinase c-Kit. Activation of c-Kit by  
424 SCF has been shown to be involved in cell migration and survival<sup>43</sup>. Our results showed a  
425 significant increase in SCF levels after 26 weeks of high ED diet consumption compared to  
426 baseline. High ED fed rats also have significantly higher levels of SFC than aged-matched, low  
427 ED fed rats.

428 FGF $\beta$  is an endocrine hormone produced by the liver, which has been shown to promote  
429 gluconeogenesis, ketogenesis, and lipid oxidation during fasting periods. However, during the  
430 fed state, FGF $\beta$  is thought to enhance insulin-mediated glucose uptake<sup>44</sup>. Our results showed a  
431 significant increase in serum levels of FGF $\beta$  after 26 weeks of high ED diet consumption  
432 compared to baseline. However, when compared to aged-matched, low ED fed rats, we observed  
433 no significant differences. It is thus possible that the changes in FGF $\beta$  levels is related to the  
434 aging process. To our knowledge, there are no other studies reporting serum FGF $\beta$  levels in rats  
435 with high ED feeding or in regards to aging.

436 IFN $\gamma$  is an important cytokine for innate and adaptive immune response against viral  
437 infections. Interferon gamma induced protein 10 (IP10) is a chemokine produced by monocytes,  
438 endothelial cells, and fibroblasts in response to IFN $\gamma$  that acts as a chemoattractant for a hosts of  
439 immune cells<sup>45</sup>. Our results revealed a slight decrease in IFN $\gamma$  and increase in IP10 after 26  
440 weeks of high ED diet consumption compared to baseline. However, there was no significant  
441 difference in the level of these cytokines between age-matched high ED fed (ED26W) and low  
442 ED fed (LF26) rats. Fenton *et al.* reported a slight, but none significant increase in male mice fed  
443 a 35% fat diet for 13 weeks<sup>42</sup>. In Sprague-Dawley rats, Muralidhar *et al.* showed that  
444 consumption of a high fat diet for 13 weeks did not affect plasma levels of IP10<sup>46</sup>. It is possible  
445 that the longitudinal change observed in this study are a result of the aging process and not  
446 necessarily triggered by high ED diet consumption. It has been previously reported that in  
447 humans subjects older than 50 years there is a decrease in IFN $\gamma$  production from mononuclear  
448 cells<sup>47</sup>.

449 Interleukin 1 $\alpha$  (IL-1 $\alpha$ ) is generally known as an epidermal pro-inflammatory cytokine<sup>48</sup>. It  
450 has also been shown that IL-1 $\alpha$  knockout mice gained less body fat and did not develop glucose

451 intolerance when fed a high fat diet for 16 weeks<sup>49</sup>. Consistent with prior reports<sup>50</sup>, our data  
452 showed that rats fed a high ED diet for 26 weeks have significantly higher levels of IL-1 $\alpha$  than  
453 low ED fed rats. Interleukin 5 (IL-5) is produced by T helper cells and is a key factor in the  
454 activation of eosinophils during allergic reactions<sup>51</sup>. Consistent with a prior study<sup>42</sup>, our results  
455 showed a significant decrease in serum levels of IL-5 after 26 weeks of high ED diet compared  
456 to baseline.

457 In general, our results revealed longitudinal changes in the serum cytokine profile of animals  
458 fed a high ED diet long-term. In addition, when we compared high ED diet fed rats at 26 weeks  
459 (ED26) to age-matched, low ED diet fed rats, rats fed high ED diet had significantly higher  
460 levels of Leptin, SCF, IL-1 $\alpha$ , and TGF $\beta$ .

461 Our research group has conducted several studies to characterize the effect of high ED diet  
462 consumption on inflammation in the brain. Vagal afferents carry information from the gut to the  
463 NTS. Reports from our laboratory and others have shown that consumption of a high ED diet  
464 triggers microglia activation in the nodose ganglia, NTS, and hypothalamus<sup>27, 52, 53</sup>. Results  
465 from this study showed that high ED diet consumption induced an inflammatory response  
466 reflected by microglia activation in the intermediate NTS after four weeks. These data further  
467 suggest that length of exposure to the high ED diet exacerbates this response since microglia  
468 activation after 26 weeks of high ED diet was significantly higher than after four weeks.

469 Our results demonstrated that consumption of a high ED diet led to a significant increase  
470 in intracellular lipid accumulation in the liver, also known as hepatic steatosis. These data are in  
471 concert with prior studies in rodents, mice and rats, which report development of hepatic  
472 steatosis after consumption of a 40% fat diet for 16 weeks<sup>54</sup>. De Rudder et al., also reported that  
473 mice developed hepatic steatosis after only four weeks of consuming a 60% fat diet<sup>55</sup>. Previous

474 studies have shown a link between microbiota dysbiosis and hepatic steatosis<sup>56, 57</sup>. The majority  
475 of the blood supply to the liver comes from the intestines through the portal vein<sup>58</sup>. Thus, an  
476 increase in gut microbes that produce toxic/inflammatory byproducts increases the gut-derived  
477 bacterial products entering the liver<sup>59</sup>. Our data revealed an increase in abundance of members of  
478 the family *Erysipelotrichaceae* and a study by Spencer et al. showed that levels of these bacteria  
479 are directly associated with changes in liver fat in female human subjects<sup>60</sup>. In addition, we saw  
480 an increase in SCFAs producers, namely members of the family *Ruminococcaceae*. The SCFAs  
481 acetate, propionate, and butyrate have been previously shown to inhibit lipid accumulation in the  
482 liver and improve hepatic function in rodents<sup>61-63</sup>. Given that the abundance of *Ruminococcaceae*  
483 was increased after 26 weeks of high ED diet consumption, it is possible that the presence of  
484 these bacteria and their byproducts contributed to prevent the progression of hepatic steatosis as  
485 there was no difference in the degree of steatosis between the four weeks (ED4) and the 26  
486 weeks group (ED26).

487         In conclusion, we have shown that long-term consumption of a high ED diet leads to  
488 increased adiposity, gut dysbiosis, hepatic steatosis, inflammation in the NTS as revealed by  
489 increased microglia activation, and increased systemic levels of inflammatory markers. Our  
490 results suggests that gut dysbiosis starts immediately upon introduction of a high ED diet. Next,  
491 as the liver is overloaded with increased accumulation of excess fat consumed and toxic bacterial  
492 byproducts, hepatic steatosis develops. At the same time, endotoxins produced by the resident  
493 gut microbiome damage vagal afferents, which in turn triggers microglia activation in the NTS.  
494 Lastly, chemokines, cytokines, and other inflammatory molecules are released from their  
495 production site (e.g. adipose tissue) into the systemic circulation. These responses are highly  
496 dynamic and play a significant role in the development of obesity and its related comorbidities.

497 In future work, is it necessary to investigate therapeutic interventions to prevent or ameliorate the  
498 development of microbiota dysbiosis as this seems to be one of the first and most detrimental  
499 consequences of consuming high ED diets.

500

501

502

503

504

505

506

507

508

509

510

511

512

513

514

515

516

517

518

519

520

521

522

523

524

## 525 **References**

- 526 1. Hildebrandt MA, Hoffmann C, Sherrill–Mix SA, Keilbaugh SA, Hamady M, Chen YY *et al.* High-fat  
527 diet determines the composition of the murine gut microbiome independently of obesity.  
528 *Gastroenterology* 2009; **137**(5): 1716-1724. e2.
- 529
- 530 2. de La Serre CB, Ellis CL, Lee J, Hartman AL, Rutledge JC, Raybould HE. Propensity to high-fat diet-  
531 induced obesity in rats is associated with changes in the gut microbiota and gut inflammation.  
532 *American Journal of Physiology-Gastrointestinal and Liver Physiology* 2010; **299**(2): G440-G448.
- 533
- 534 3. Stolarczyk E. Adipose tissue inflammation in obesity: a metabolic or immune response? *Current*  
535 *opinion in pharmacology* 2017; **37**: 35-40.
- 536
- 537 4. Jo J, Gavrilova O, Pack S, Jou W, Mullen S, Sumner AE *et al.* Hypertrophy and/or hyperplasia:  
538 dynamics of adipose tissue growth. *PLoS computational biology* 2009; **5**(3): e1000324.
- 539
- 540 5. Nishimura S, Manabe I, Nagasaki M, Hosoya Y, Yamashita H, Fujita H *et al.* Adipogenesis in  
541 obesity requires close interplay between differentiating adipocytes, stromal cells, and blood  
542 vessels. *Diabetes* 2007; **56**(6): 1517-1526.
- 543
- 544 6. Asterholm IW, Tao C, Morley TS, Wang QA, Delgado-Lopez F, Wang ZV *et al.* Adipocyte  
545 inflammation is essential for healthy adipose tissue expansion and remodeling. *Cell metabolism*  
546 2014; **20**(1): 103-118.
- 547
- 548 7. Fujisaka S, Usui I, Bukhari A, Ikutani M, Oya T, Kanatani Y *et al.* Regulatory mechanisms for  
549 adipose tissue M1 and M2 macrophages in diet-induced obese mice. *Diabetes* 2009; **58**(11):  
550 2574-2582.
- 551
- 552 8. Lumeng CN, Bodzin JL, Saltiel AR. Obesity induces a phenotypic switch in adipose tissue  
553 macrophage polarization. *The Journal of clinical investigation* 2007; **117**(1): 175-184.
- 554
- 555 9. Vitseva OI, Tanriverdi K, Tchkonina TT, Kirkland JL, McDonnell ME, Apovian CM *et al.* Inducible  
556 Toll-like receptor and NF- $\kappa$ B regulatory pathway expression in human adipose tissue. *Obesity*  
557 2008; **16**(5): 932-937.
- 558
- 559 10. Watanabe Y, Nagai Y, Takatsu K. Activation and regulation of the pattern recognition receptors  
560 in obesity-induced adipose tissue inflammation and insulin resistance. *Nutrients* 2013; **5**(9):  
561 3757-3778.
- 562
- 563 11. Vijay-Kumar M, Aitken JD, Carvalho FA, Cullender TC, Mwangi S, Srinivasan S *et al.* Metabolic  
564 syndrome and altered gut microbiota in mice lacking Toll-like receptor 5. *Science* 2010;  
565 **328**(5975): 228-231.

- 566  
567 12. Berthoud HR, Powley TL. Vagal afferent innervation of the rat fundic stomach: morphological  
568 characterization of the gastric tension receptor. *J Comp Neurol* 1992; **319**(2): 261-76.
- 569  
570 13. Adams LA, Angulo P, Lindor KD. Nonalcoholic fatty liver disease. *Can Med Assoc J* 2005; **172**(7):  
571 899-905.
- 572  
573 14. Angulo P. Medical progress - Nonalcoholic fatty liver disease. *New Engl J Med* 2002; **346**(16):  
574 1221-1231.
- 575  
576 15. Slauson DO, Cooper BJ. *Mechanisms of disease: A textbook of comparative general pathology*,  
577 Mosby Inc., 2002.
- 578  
579 16. Kunnecke B, Verry P, Benardeau A, von Kienlin M. Quantitative body composition analysis in  
580 awake mice and rats by magnetic resonance relaxometry. *Obes Res* 2004; **12**(10): 1604-15.
- 581  
582 17. Klindworth A, Pruesse E, Schweer T, Peplies J, Quast C, Horn M *et al.* Evaluation of general 16S  
583 ribosomal RNA gene PCR primers for classical and next-generation sequencing-based diversity  
584 studies. *Nucleic acids research* 2013; **41**(1): e1-e1.
- 585  
586 18. Caporaso JG, Kuczynski J, Stombaugh J, Bittinger K, Bushman FD, Costello EK *et al.* QIIME allows  
587 analysis of high-throughput community sequencing data. *Nature methods* 2010; **7**(5): 335.
- 588  
589 19. Segata N, Izard J, Waldron L, Gevers D, Miropolsky L, Garrett WS *et al.* Metagenomic biomarker  
590 discovery and explanation. *Genome biology* 2011; **12**(6): R60.
- 591  
592 20. Arndt D, Xia J, Liu Y, Zhou Y, Guo AC, Cruz JA *et al.* METAGENassist: a comprehensive web server  
593 for comparative metagenomics. *Nucleic acids research* 2012; **40**(W1): W88-W95.
- 594  
595 21. Gallaher ZR, Ryu V, Herzog T, Ritter RC, Czaja K. Changes in microglial activation within the  
596 hindbrain, nodose ganglia, and the spinal cord following subdiaphragmatic vagotomy. *Neurosci*  
597 *Lett* 2012; **513**(1): 31-36.
- 598  
599 22. Peters JH, Gallaher ZR, Ryu V, Czaja K. Withdrawal and restoration of central vagal afferents  
600 within the dorsal vagal complex following subdiaphragmatic vagotomy. *J. Comp. Neurol.* 2013;  
601 **521**(15): 3584-3599.
- 602  
603 23. Dulce M, Minaya PMDL, Andras Hajnal and Krzysztof Czaja. Roux-en-Y gastric bypass surgery  
604 triggers rapid DNA  
605 fragmentation in vagal afferent neurons in rats. *Acta Neurobiol Exp* 2019; **79**: 332-344.



- 606  
607 24. Brunt EM, Kleiner DE, Wilson LA, Belt P, Neuschwander-Tetri BA, Network NCR. Nonalcoholic  
608 Fatty Liver Disease (NAFLD) Activity Score and the Histopathologic Diagnosis in NAFLD: Distinct  
609 Clinicopathologic Meanings. *Hepatology* 2011; **53**(3): 810-820.
- 610  
611 25. Conlon MA, Bird AR. The Impact of Diet and Lifestyle on Gut Microbiota and Human Health.  
612 *Nutrients* 2015; **7**(1): 17-44.
- 613  
614 26. Sen T, Cawthon CR, Ihde BT, Hajnal A, DiLorenzo PM, de La Serre CB *et al.* Diet-driven microbiota  
615 dysbiosis is associated with vagal remodeling and obesity. *Physiol Behav* 2017; **173**: 305-317.
- 616  
617 27. Vaughn AC, Cooper EM, DiLorenzo PM, O'Loughlin LJ, Konkol ME, Peters JH *et al.* Energy-dense  
618 diet triggers changes in gut microbiota, reorganization of gut-brain vagal communication and  
619 increases body fat accumulation. *Acta Neurobiol Exp* 2017; **77**(1): 18-30.
- 620  
621 28. Woods SC, Seeley RJ, Rushing PA, D'Alessio D, Tso P. A controlled high-fat diet induces an obese  
622 syndrome in rats. *J Nutr* 2003; **133**(4): 1081-1087.
- 623  
624 29. de Lartigue G, de la Serre CB, Espero E, Lee J, Raybould HE. Diet-induced obesity leads to the  
625 development of leptin resistance in vagal afferent neurons. *Am J Physiol-Endoc M* 2011; **301**(1):  
626 E187-E195.
- 627  
628 30. Lomba A, Martinez JA, Garcia-Diaz DF, Paternain L, Marti A, Campion J *et al.* Weight gain  
629 induced by an isocaloric pair-fed high fat diet: A nutriepigenetic study on FASN and NDUFB6  
630 gene promoters. *Molecular Genetics and Metabolism* 2010; **101**(2-3): 273-278.
- 631  
632 31. Kaakoush NO. Insights into the Role of Erysipelotrichaceae in the Human Host. *Front Cell Infect*  
633 *Mi* 2015; **5**.
- 634  
635 32. Riva A, Borgo F, Lassandro C, Verduci E, Morace G, Borghi E *et al.* Pediatric obesity is associated  
636 with an altered gut microbiota and discordant shifts in Firmicutes populations. *Environ Microbiol*  
637 2017; **19**(1): 95-105.
- 638  
639 33. Stanley D, Hughes RJ, Geier MS, Moore RJ. Bacteria within the Gastrointestinal Tract Microbiota  
640 Correlated with Improved Growth and Feed Conversion: Challenges Presented for the  
641 Identification of Performance Enhancing Probiotic Bacteria. *Front Microbiol* 2016; **7**.
- 642  
643 34. Muhomah TA, Nishino N, Katsumata E, Wu HM, Tsuruta T. High-fat diet reduces the level of  
644 secretory immunoglobulin A coating of commensal gut microbiota. *Biosci Microb Food H* 2019;  
645 **38**(2): 55-64.
- 646

- 647 35. Louis P, Flint HJ. Formation of propionate and butyrate by the human colonic microbiota.  
648 *Environ Microbiol* 2017; **19**(1): 29-41.
- 649  
650 36. Evans CC, LePard KJ, Kwak JW, Stancukas MC, Laskowski S, Dougherty J *et al.* Exercise Prevents  
651 Weight Gain and Alters the Gut Microbiota in a Mouse Model of High Fat Diet-Induced Obesity.  
652 *Plos One* 2014; **9**(3).
- 653  
654 37. Borst SE, Conover CF. High-fat diet induces increased tissue expression of TNF-alpha. *Life Sci*  
655 2005; **77**(17): 2156-65.
- 656  
657 38. Ghibaudo L, Cook J, Farley C, Van Heek M, Hwa JJ. Fat intake affects adiposity, comorbidity  
658 factors, and energy metabolism of sprague-dawley rats. *Obesity research* 2002; **10**(9): 956-963.
- 659  
660 39. Mn M, Smvk P, Battula KK, Nv G, Kalashikam RR. Differential response of rat strains to  
661 obesogenic diets underlines the importance of genetic makeup of an individual towards obesity.  
662 *Sci Rep* 2017; **7**(1): 9162.
- 663  
664 40. Woods SC, Seeley RJ, Rushing PA, D'Alessio D, Tso P. A controlled high-fat diet induces an obese  
665 syndrome in rats. *J Nutr* 2003; **133**(4): 1081-7.
- 666  
667 41. Bravo E, Palleschi S, Aspichueta P, Buque X, Rossi B, Cano A *et al.* High fat diet-induced non  
668 alcoholic fatty liver disease in rats is associated with hyperhomocysteinemia caused by down  
669 regulation of the transsulphuration pathway. *Lipids Health Dis* 2011; **10**.
- 670  
671 42. Fenton JI, Nunez N, Yakar S, Perkins S, Hord N, Hursting S. Diet-induced adiposity alters the  
672 serum profile of inflammation in C57BL/6N mice as measured by antibody array. *Diabetes,*  
673 *Obesity and Metabolism* 2009; **11**(4): 343-354.
- 674  
675 43. Lennartsson J, Ronnstrand L. STEM CELL FACTOR RECEPTOR/c-KIT: FROM BASIC SCIENCE TO  
676 CLINICAL IMPLICATIONS. *Physiol Rev* 2012; **92**(4): 1619-1649.
- 677  
678 44. BonDurant LD, Potthoff MJ. Fibroblast Growth Factor 21: A Versatile Regulator of Metabolic  
679 Homeostasis. *Annu Rev Nutr* 2018; **38**: 173-196.
- 680  
681 45. Metzemaekers M, Vanheule V, Janssens R, Struyf S, Proost P. Overview of the Mechanisms that  
682 May Contribute to the Non-Redundant Activities of Interferon-Inducible CXC Chemokine  
683 Receptor 3 Ligands. *Frontiers in Immunology* 2018; **8**.
- 684  
685 46. Muralidhar MN, Prasad SMVK, Battula KK, Giridharan NV, Kalashikam RR. Differential response  
686 of rat strains to obesogenic diets underlines the importance of genetic makeup of an individual  
687 towards obesity. *Sci Rep-Uk* 2017; **7**.

- 688  
689 47. Abb J, Abb H, Deinhardt F. Age-related decline of human interferon alpha and interferon gamma  
690 production. *Blut* 1984; **48**(5): 285-9.
- 691  
692 48. Hanel KH, Pfaff CM, Cornelissen C, Amann PM, Marquardt Y, Czaja K *et al.* Control of the Physical  
693 and Antimicrobial Skin Barrier by an IL-31-IL-1 Signaling Network. *Journal of Immunology* 2016;  
694 **196**(8): 3233-3244.
- 695  
696 49. Almog T, Kandel Kfir M, Levkovich H, Shlomai G, Barshack I, Stienstra R *et al.* Interleukin-1alpha  
697 deficiency reduces adiposity, glucose intolerance and hepatic de-novo lipogenesis in diet-  
698 induced obese mice. *BMJ Open Diabetes Res Care* 2019; **7**(1): e000650.
- 699  
700 50. Collins KH, Hart DA, Seerattan RA, Reimer RA, Herzog W. High-fat/high-sucrose diet-induced  
701 obesity results in joint-specific development of osteoarthritis-like degeneration in a rat model.  
702 *Bone Joint Res* 2018; **7**(4): 274-281.
- 703  
704 51. Sanderson CJ. Interleukin-5, eosinophils, and disease. *Blood* 1992; **79**(12): 3101-9.
- 705  
706 52. Waise TMZ, Toshinai K, Naznin F, NamKoong C, Moin AM, Sakoda H *et al.* One-day high-fat diet  
707 induces inflammation in the nodose ganglion and hypothalamus of mice. *Biochem Bioph Res Co*  
708 2015; **464**(4): 1157-1162.
- 709  
710 53. Yi CX, Tschop MH, Woods SC, Hofmann SM. High-fat-diet exposure induces IgG accumulation in  
711 hypothalamic microglia. *Dis Model Mech* 2012; **5**(5): 686-690.
- 712  
713 54. Jensen VS, Tveden-Nyborg P, Zacho-Rasmussen C, Quaade ML, Ipsen DH, Hvid H *et al.* Variation  
714 in diagnostic NAFLD/NASH read-outs in paired liver samples from rodent models. *J Pharmacol*  
715 *Toxicol Methods* 2019; **101**: 106651.
- 716  
717 55. De Rudder M, Bouzin C, Nachit M, Louvegny H, Vande Velde G, Jule Y *et al.* Automated  
718 computerized image analysis for the user-independent evaluation of disease severity in  
719 preclinical models of NAFLD/NASH. *Lab Invest* 2019.
- 720  
721 56. Liu Q, Liu SS, Chen LZ, Zhao ZZ, Du SX, Dong QJ *et al.* Role and effective therapeutic target of gut  
722 microbiota in NAFLD/NASH. *Exp Ther Med* 2019; **18**(3): 1935-1944.
- 723  
724 57. Ji Y, Yin Y, Li ZR, Zhang WZ. Gut Microbiota-Derived Components and Metabolites in the  
725 Progression of Non-Alcoholic Fatty Liver Disease (NAFLD). *Nutrients* 2019; **11**(8).
- 726

- 727 58. Compare D, Coccoli P, Rocco A, Nardone OM, De Maria S, Carteni M *et al.* Gut--liver axis: the  
728 impact of gut microbiota on non alcoholic fatty liver disease. *Nutr Metab Cardiovasc Dis* 2012;  
729 **22**(6): 471-6.
- 730
- 731 59. Baffy G. Potential mechanisms linking gut microbiota and portal hypertension. *Liver Int* 2019;  
732 **39**(4): 598-609.
- 733
- 734 60. Spencer MD, Hamp TJ, Reid RW, Fischer LM, Zeisel SH, Fodor AA. Association Between  
735 Composition of the Human Gastrointestinal Microbiome and Development of Fatty Liver With  
736 Choline Deficiency. *Gastroenterology* 2011; **140**(3): 976-986.
- 737
- 738 61. Nishina PM, Freedland RA. Effects of Propionate on Lipid Biosynthesis in Isolated Rat  
739 Hepatocytes. *J Nutr* 1990; **120**(7): 668-673.
- 740
- 741 62. Tedelind S, Westberg F, Kjerrulf M, Vidal A. Anti-inflammatory properties of the short-chain fatty  
742 acids acetate and propionate: A study with relevance to inflammatory bowel disease. *World J*  
743 *Gastroentero* 2007; **13**(20): 2826-2832.
- 744
- 745 63. Sahuri-Arisoylu M, Brody LP, Parkinson JR, Parkes H, Navaratnam N, Miller AD *et al.*  
746 Reprogramming of hepatic fat accumulation and 'browning' of adipose tissue by the short-chain  
747 fatty acid acetate. *Int J Obesity* 2016; **40**(6): 955-963.
- 748
- 749

## Figure Captions

**Fig. 1.** High energy density (ED) diet consumption significantly increased body weight and body fat mass. Shown are mean  $\pm$  SD kcal consumed (A, D, G), body weight (B, E, H), and body fat mass (C, F, I) for rats fed high ED for four weeks (**STED**; n = 6, top row), rats fed high ED for 26 weeks (**LTED**; n = 9, middle row), and end-point comparison of rats fed low ED vs high ED for 26 weeks (n = 9 per group, bottom row). Animals significantly increased their caloric intake upon introduction of the high ED diet, but caloric intake declined after one week and remained stable for the duration of the study. High ED diet consumption significantly increased body weight and fat mass. Bars denoted with different letters (a, ab, b) differ statistically. Asterisks indicate statistical significance from baseline.  $P < 0.05$ .

**Fig. 2.** Consumption of a high energy density (ED) diet triggered progressive remodeling of the gut microbiota. The left (A, B, C) and right (D, E, F) columns represent data from the **STED** (n = 6) and **LTED** (n = 9) groups, respectively. **A, D**) Shannon index shown as mean  $\pm$  SD for each group and time point. Bacterial diversity was significantly decreased after consuming the high ED diet for one week (ED1) compared to baseline (LF). There were no other significant changes observed. **B, E**) Principal Coordinate Analysis showing microbiota from all time points. In the **STED** group (B), the microbiota of all rats clustered together at baseline (LF). One week after introduction of the high ED diet (ED1), the microbiota clustered together and away from their baseline profile. At week 4 (ED4), the microbiota clustered together and further away from their baseline profile. In the **LTED** group (E), the microbiota of all rats fed the high ED diet clustered together, independent of time point, and away from the microbiota of rats fed a low ED diet (LF26). **C, F**) Cladogram produced from LDA scores (see Supplementary Fig. S2 for LDA

scores). In the STED group (C), at baseline (LF), the microbiota is characterized by abundant members of the *Bacteroidetes* order *Bacteroidales*. One week after high ED diet introduction (ED1), the microbiota was characterized by abundant members of the *Firmicutes* order *Erysipelotrichales*. After four weeks of high ED diet (ED4), the microbiota was characterized by abundant members of the *Actinobacteria* order *Actinomycetales* and *Verrucomicrobia* order *Verrucomicrobiales*. In the LTED group (F), at ED4 the microbiota was characterized by abundant members of *Bacteroidetes* order *Bacteroidales* and *Firmicutes* orders *Bacillales* and *Clostridiales*. Eight weeks after high ED diet introduction (ED8), the microbiota was characterized by abundant members of the *Bacteroidetes* order *Bacteroidales* and *Firmicutes* orders *Lactobacillales*, *Turicibacterales*, and *Clostridiales*. After 26 weeks of high ED diet (ED26), the microbiota was characterized by abundant members of *Bacteroidetes* orders *Bacteroidales*. The microbiota of the low ED diet control group (LF26) was characterized by abundant members of *Bacteroidetes* orders *Bacteroidales* and *Flavobacteriales*, and *Firmicutes* order *Clostridiales*.

**Fig. 3.** Microbial composition of rats fed a high energy dense diet for 4 weeks (STED, n = 6) or 26 weeks (LTED, n = 9) and rats fed a low energy dense diet for 26 weeks (LF26, n = 9). All phylogenetic levels present with abundance > 1% are represented. **A, C)** relative abundances of phyla at the family level in the STED group and in the LTED. **B, D)** Ratio of Firmucutes to Bacteroidetes in the STED and LTED group. In the STED group, high ED diet consumption significantly increased the abundance of members of *Erysipelotrichaceae* (LF 3.8% vs ED1 60% and ED4 41%,  $P_s < 0.0001$ ) of the phylum *Firmicutes*. Members of the family *S24-7* of the phylum *Bacteroidetes* were significantly depleted by high ED diet consumption (A). In addition,

the ratio of *Firmicutes* to *Bacteroidetes* was significantly higher at one and four weeks of high ED diet compared to baseline (B). In the LTED group, compared to low ED diet fed rats, high ED diet fed rats had significantly higher abundance of members of *Bacteroidaceae* and *Ruminococcaceae*, and significantly lower abundance of members of *Peptostreptococcaceae* and *Verrucomicrobiaceae*.(C). In high ED fed rats, the *Firmicutes-to-Bacteroidetes* ratio was significantly higher after eight weeks compared to after four and 26 weeks (ED8 11.5 vs ED4 6.4 and ED26 5.7,  $P_s < 0.01$ ). Compared to low ED controls (LF26), high ED fed rats had a significantly lower *Firmicutes-to-Bacteroidetes* ratio at four and 26 weeks (D). In the legend, following the name of each family, higher taxonomic classifications are indicated by letters in parentheses. Phylum: A, Actinobacteria; B, Bacteroidetes; F, Firmicutes; V, Verrucomicrobia. Class: A, Actinobacteria; B, Bacilli if preceded by F and Bacteroidia if preceded by B; C, Clostridia; E, Erysipelotrichia; F, Flavobacteria; V, Verrucomicrobiae; O, Opitutae. Order: A, Actinomycetales; B, Bacteroidales; C, Clostridiales if preceded by C and Cerasicoccales if preceded by O; E, Erysipelotrichiales; F, Flavobacteriales; L, Lactobacillales; T, Turibacterales; V, Verrucomicrobiales. Bars denoted with different letters (a, b, c) differ significantly,  $P < 0.05$ . Data are means  $\pm$  SD.

**Fig. 4.** Consumption of a high ED diet significantly increased microglia activation in the intermediate NTS. Representative sections of intermediate NTS of animals fed a low ED diet for 26 weeks (LF26,  $n = 9$ ), a high ED diet for four weeks (ED4,  $n = 5$ ), and a high ED diet for 26 weeks (ED26,  $n = 5$ ) are shown. Binary analysis of the area fraction of Iba1 immunoreactivity showed that animals fed a high ED for four and 26 weeks exhibited significantly more microglia activation than low ED fed controls. In addition, microglia activation after 26 weeks of high ED

diet was significantly higher than after four weeks. Graphs represent mean  $\pm$  SD Iba1 intensity. Bars denoted with different letters (a, b, c) differ significantly ( $P < 0.05$ ). NTS = Nucleus Tractus Solitarius; AP = Area Postrema. Scale bar = 200  $\mu\text{m}$ .

**Fig. 5.** High ED diet intake induces hepatic lipidosis. Representative histopathological images of hematoxylin and eosin stained (top row) and oil-red-o stained (bottom row) hepatic tissue from rats fed a low ED diet (left column), rats fed a high ED for 4 weeks (middle column), and rats fed a high ED for 26 weeks (right column),  $n = 3$  for each group. H&E staining revealed an increase in distinct vacuoles in rats fed the high ED diet (ED4 and ED26) compared to low ED controls (LF26) (top row). Similarly, ORO staining showed that high ED fed animals exhibited more intensely red granules (ED4 and ED26) than low ED controls (LF26) (bottom row). The quantitative scoring (Table) confirmed that hepatocellular lipidosis is apparent after consuming a high ED diet for four weeks. We did not observe significant differences in the extent of hepatocellular lipidosis between the STED (ED4) and LTED (ED26) groups. Low ED fed rats did not show signs of hepatocellular lipidosis. Graph represents mean  $\pm$  SD binary analysis of the area fraction of ORO staining, which further confirms our results. Bars denoted with different letters (a, b, c) differ significantly ( $P < 0.05$ ). Scale bar for images is 100  $\mu\text{m}$ . Scale bar of insert is 80  $\mu\text{m}$ .

**Supplementary Fig. S1.** Rarefraction curves by diet group and experimental time point. Data are shown as mean for rats fed a high energy dense diet for 4 weeks (A, STED) or 26 weeks (B, LTED).



**Supplementary Fig. S2.** LDA scores used for generation of cladogram (Fig. 3C). Colors designate time point: Blue: LF/baseline, Red: ED1, one week after introduction of high ED diet, Green: ED4, four weeks after introduction of high ED diet.

**Supplementary Fig. S3.** LDA scores used for generation of cladogram (Fig. 3F). Colors designate time point: Purple: LF26, after 26 weeks of low ED diet, Green: ED4, four weeks after introduction of high ED diet. Blue: ED8, four weeks after introduction of high ED diet. Red: ED26, 26 weeks after introduction of high ED diet,

**Fig. 1**

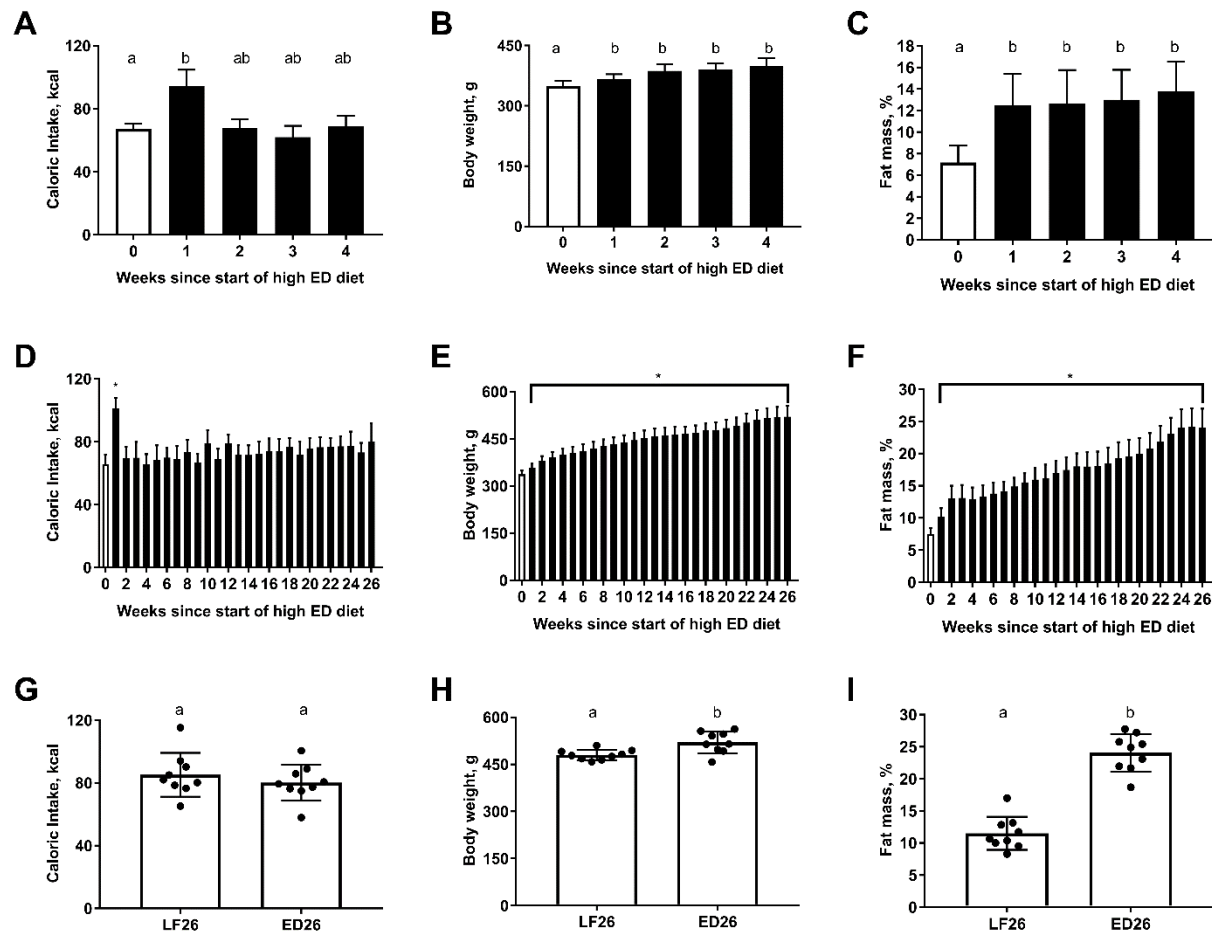

**Fig. 2**

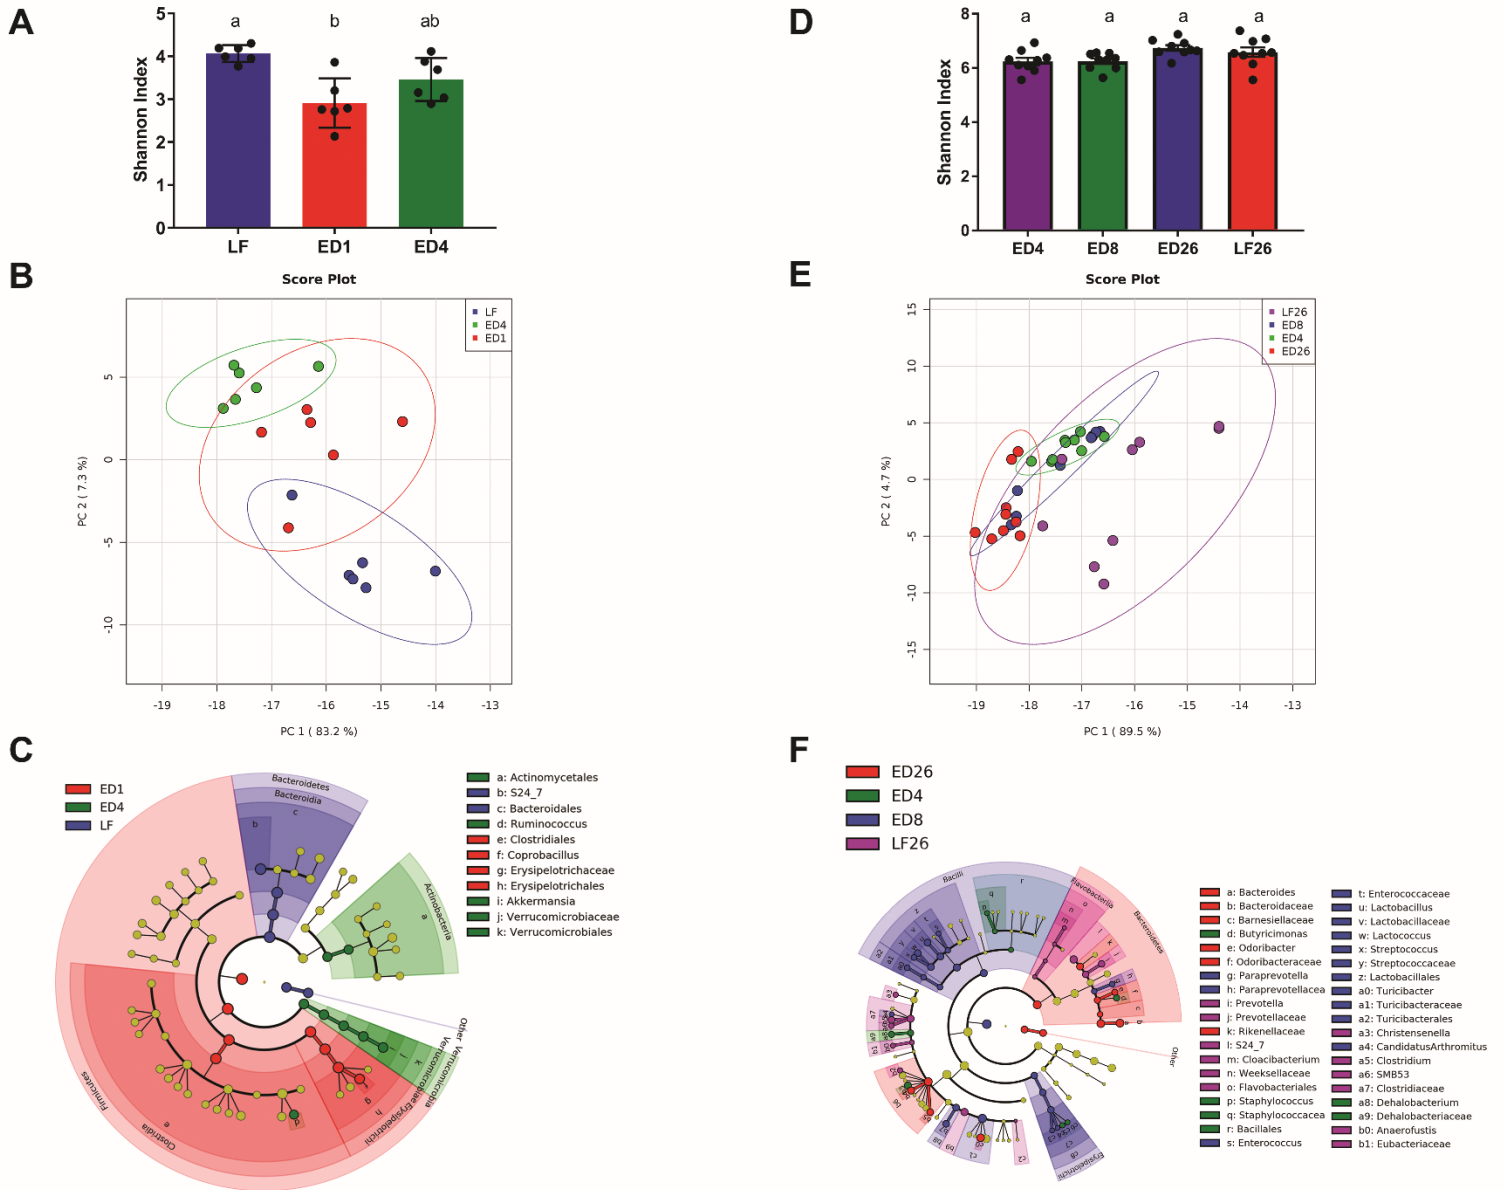

**Fig. 3**

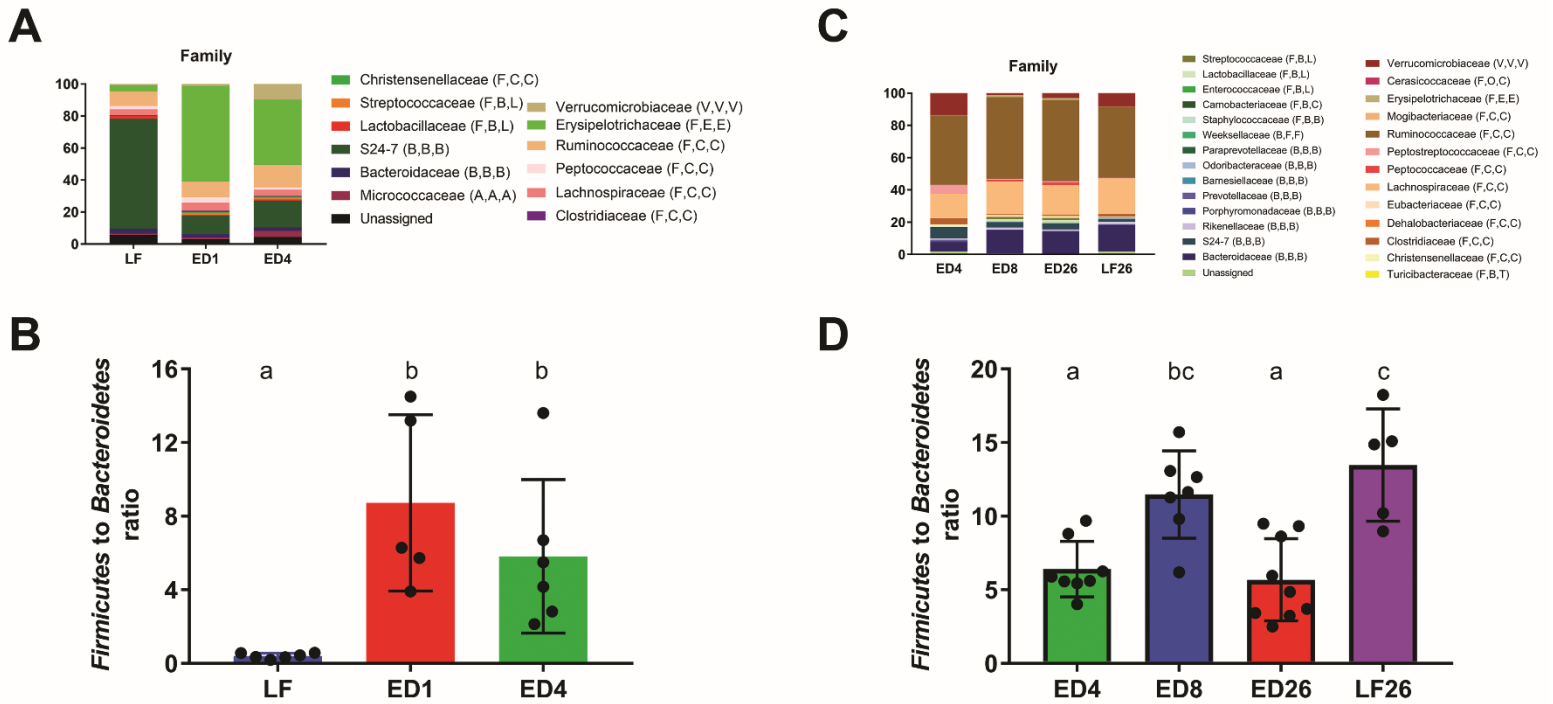

**Fig. 4**

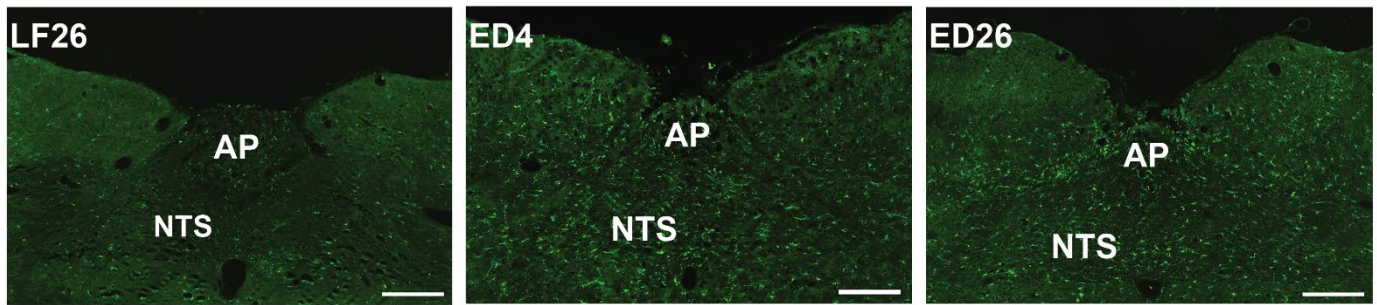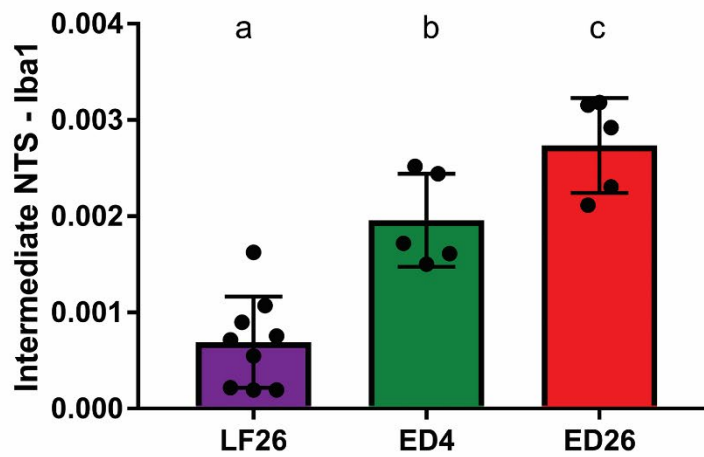

**Fig. 5**

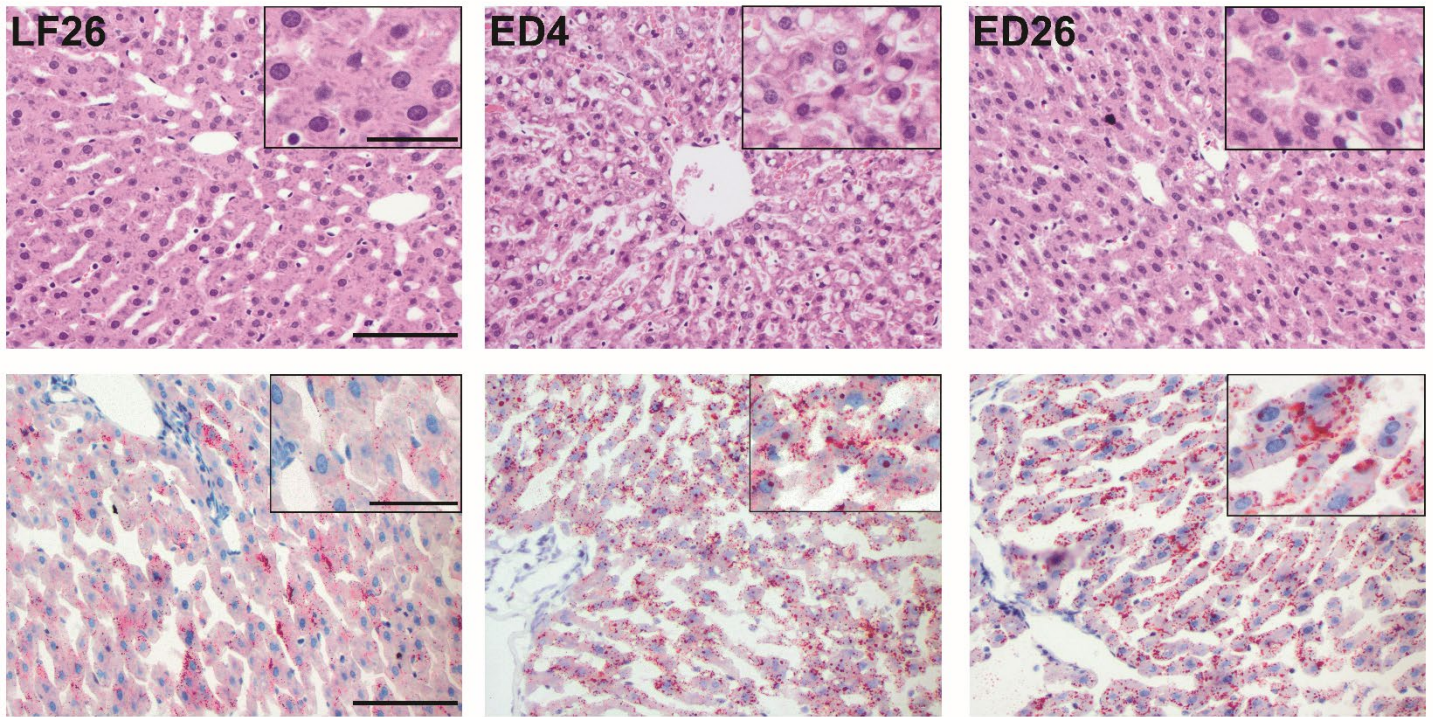

|      | 0 | 1 | 2 | 3 | 4 |
|------|---|---|---|---|---|
| LF26 | 8 | 1 | 0 | 0 | 0 |
| ED4  | 1 | 2 | 2 | 1 | 0 |
| ED26 | 2 | 4 | 2 | 1 | 0 |

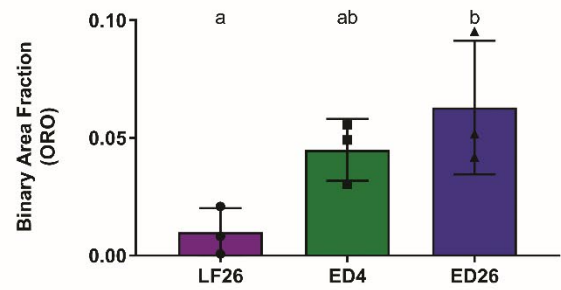

## Supplementary Fig. S1.

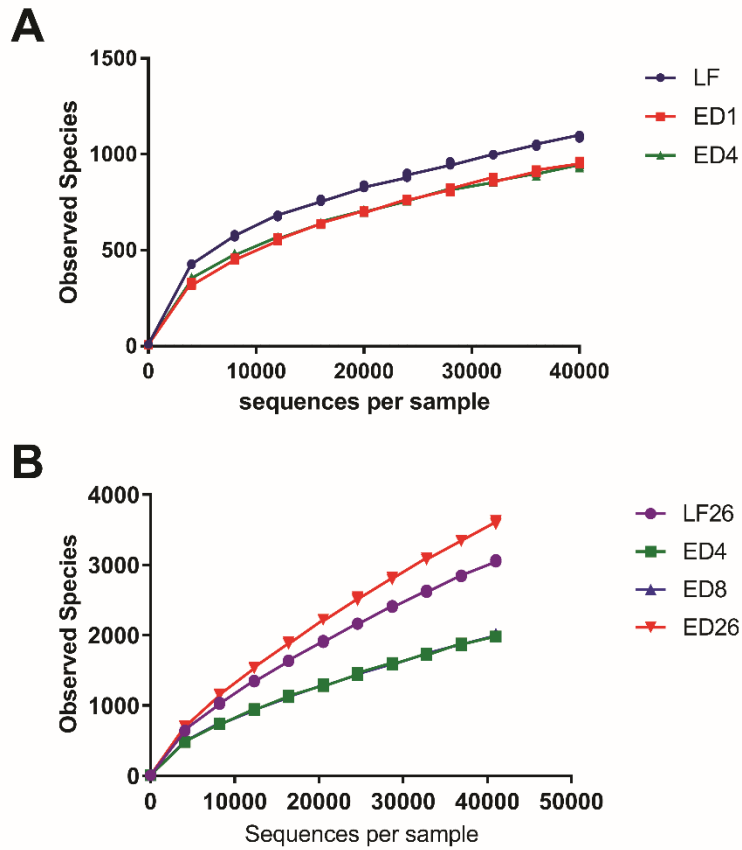

## Supplementary Fig. S2.

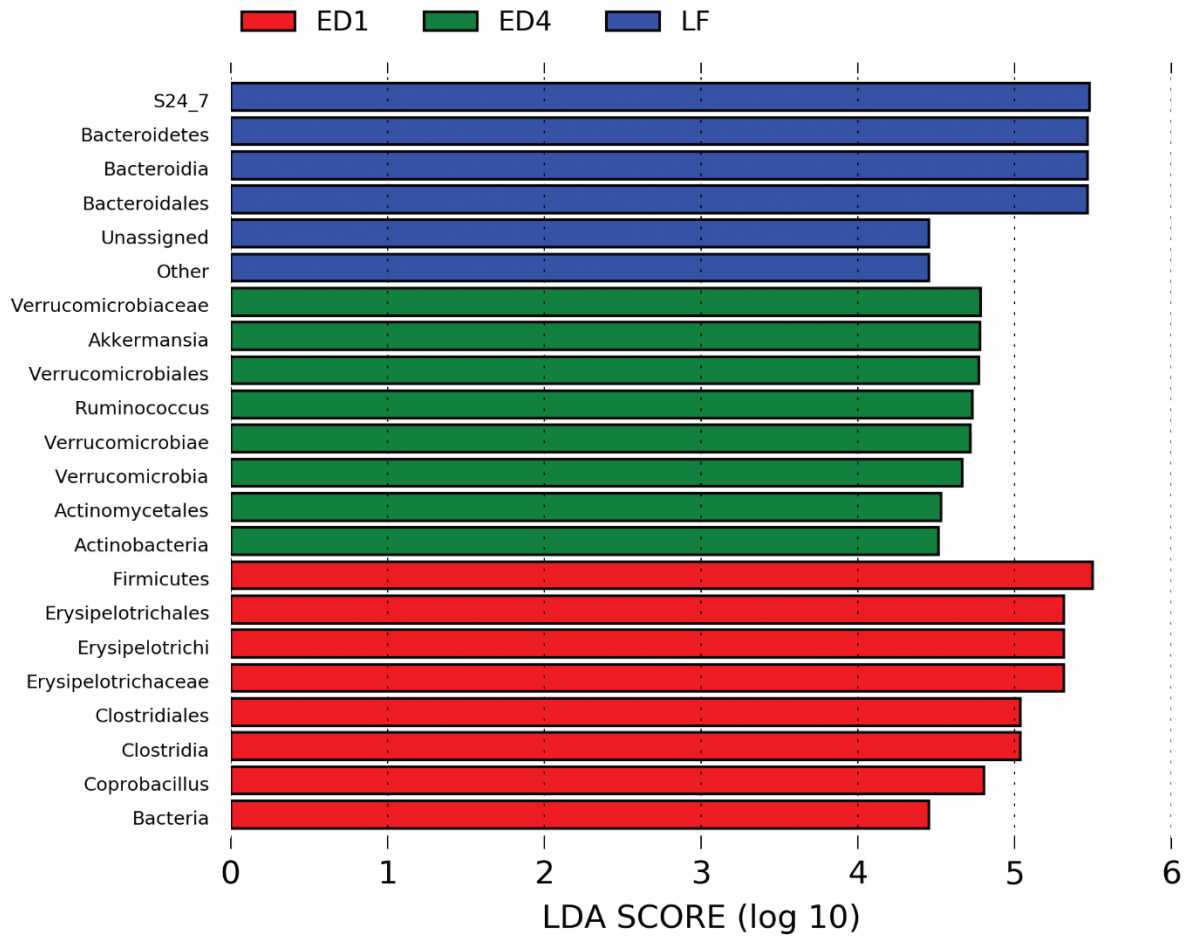



### Supplementary Fig. S3.

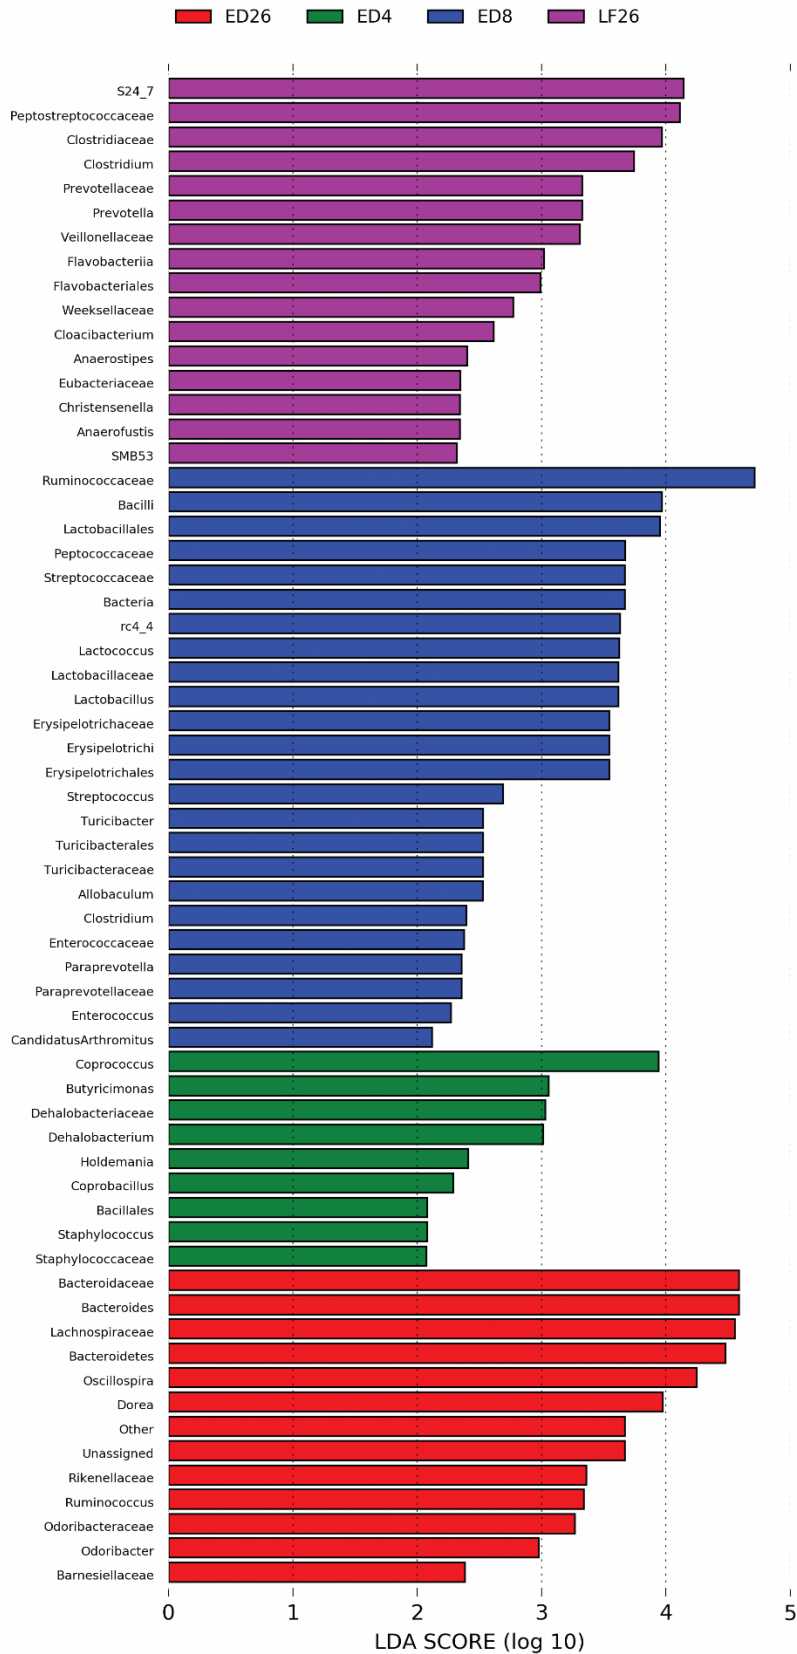

**Table 1.** Cytokine/chemokine optical density values  $\pm$  SD.

|                                     | STED                       |                                | LTED                       |                                         |                                         |                                          |                            |
|-------------------------------------|----------------------------|--------------------------------|----------------------------|-----------------------------------------|-----------------------------------------|------------------------------------------|----------------------------|
|                                     | LF                         | ED4                            | LF                         | ED4                                     | ED8                                     | ED26                                     | LF26                       |
| <b>TNF<math>\alpha</math>, OD</b>   | 0.057 $\pm$ 0.016          | 0.044 $\pm$ 0.011 <sup>#</sup> | 0.049 $\pm$ 0.014          | 0.044 $\pm$ 0.006 <sup>*</sup>          | 0.038 $\pm$ 0.003 <sup>#</sup>          | 0.057 $\pm$ 0.016                        | 0.062 $\pm$ 0.052          |
| <b>VEGF, OD</b>                     | 0.029 $\pm$ 0.006          | 0.026 $\pm$ 0.005              | 0.027 $\pm$ 0.005          | 0.025 $\pm$ 0.004                       | 0.019 $\pm$ 0.002                       | 0.024 $\pm$ 0.005                        | 0.022 $\pm$ 0.011          |
| <b>FGF<math>\beta</math>, OD</b>    | 0.016 $\pm$ 0.001          | 0.015 $\pm$ 0.001              | 0.014 $\pm$ 0.003          | 0.028 $\pm$ 0.009 <sup>#†</sup>         | 0.017 $\pm$ 0.007 <sup>†</sup>          | 0.037 $\pm$ 0.007 <sup>#</sup>           | 0.042 $\pm$ 0.042          |
| <b>IFN<math>\gamma</math>, OD</b>   | 0.056 $\pm$ 0.019          | 0.045 $\pm$ 0.009              | 0.055 $\pm$ 0.015          | 0.036 $\pm$ 0.011                       | 0.032 $\pm$ 0.005 <sup>#</sup>          | 0.031 $\pm$ 0.004 <sup>#</sup>           | 0.036 $\pm$ 0.031          |
| <b>Leptin, OD</b>                   | 0.049 $\pm$ 0.014          | 0.041 $\pm$ 0.005              | 0.042 $\pm$ 0.002<br>n = 8 | 0.068 $\pm$ 0.022 <sup>†</sup><br>n = 8 | 0.079 $\pm$ 0.071 <sup>†</sup><br>n = 8 | 0.472 $\pm$ 0.092 <sup>#‡</sup><br>n = 8 | 0.089 $\pm$ 0.043<br>n = 8 |
| <b>MCP-1, OD</b>                    | 0.027 $\pm$ 0.007          | 0.022 $\pm$ 0.003              | 0.035 $\pm$ 0.007          | 0.08 $\pm$ 0.040 <sup>#†</sup>          | 0.036 $\pm$ 0.027 <sup>†</sup>          | 0.123 $\pm$ 0.039 <sup>#</sup>           | 0.103 $\pm$ 0.075          |
| <b>SCF, OD</b>                      | 0.074 $\pm$ 0.024          | 0.077 $\pm$ 0.038              | 0.064 $\pm$ 0.021          | 0.058 $\pm$ 0.008 <sup>†</sup>          | 0.053 $\pm$ 0.010 <sup>†</sup>          | 0.124 $\pm$ 0.050 <sup>#‡</sup>          | 0.063 $\pm$ 0.032          |
| <b>MIP-1<math>\alpha</math>, OD</b> | 0.019 $\pm$ 0.003          | 0.017 $\pm$ 0.006              | 0.014 $\pm$ 0.002          | 0.074 $\pm$ 0.043 <sup>#</sup>          | 0.043 $\pm$ 0.046 <sup>†</sup>          | 0.108 $\pm$ 0.019 <sup>#</sup>           | 0.089 $\pm$ 0.043          |
| <b>IL-1<math>\alpha</math>, OD</b>  | 0.059 $\pm$ 0.005          | 0.027 $\pm$ 0.002 <sup>#</sup> | 0.054 $\pm$ 0.022          | 0.058 $\pm$ 0.044                       | 0.032 $\pm$ 0.006 <sup>†</sup>          | 0.067 $\pm$ 0.026 <sup>‡</sup>           | 0.024 $\pm$ 0.009          |
| <b>IL-1<math>\beta</math>, OD</b>   | 0.069 $\pm$ 0.017          | 0.056 $\pm$ 0.005              | 0.059 $\pm$ 0.021          | 0.050 $\pm$ 0.009                       | 0.043 $\pm$ 0.004                       | 0.071 $\pm$ 0.028                        | 0.054 $\pm$ 0.032          |
| <b>IL-5, OD</b>                     | 0.059 $\pm$ 0.018          | 0.047 $\pm$ 0.007              | 0.054 $\pm$ 0.016          | 0.032 $\pm$ 0.009                       | 0.048 $\pm$ 0.049                       | 0.029 $\pm$ 0.007 <sup>#</sup>           | 0.029 $\pm$ 0.019          |
| <b>IL-6, OD</b>                     | 0.021 $\pm$ 0.003          | 0.021 $\pm$ 0.007              | 0.018 $\pm$ 0.003          | 0.022 $\pm$ 0.003                       | 0.016 $\pm$ 0.003                       | 0.031 $\pm$ 0.011                        | 0.024 $\pm$ 0.012          |
| <b>IL-15, OD</b>                    | 0.051 $\pm$ 0.016          | 0.045 $\pm$ 0.010              | 0.046 $\pm$ 0.011          | 0.035 $\pm$ 0.005                       | 0.031 $\pm$ 0.005 <sup>#†</sup>         | 0.046 $\pm$ 0.012                        | 0.042 $\pm$ 0.035          |
| <b>IP-10, OD</b>                    | 0.029 $\pm$ 0.004          | 0.032 $\pm$ 0.004              | 0.021 $\pm$ 0.007          | 0.021 $\pm$ 0.004 <sup>†</sup>          | 0.026 $\pm$ 0.003                       | 0.029 $\pm$ 0.004 <sup>#</sup>           | 0.027 $\pm$ 0.007          |
| <b>Rantes, OD</b>                   | 1.183 $\pm$ 0.179          | 0.898 $\pm$ 0.169              | 1.191 $\pm$ 0.289          | 0.925 $\pm$ 0.317 <sup>†</sup>          | 1.042 $\pm$ 0.312 <sup>†</sup>          | 0.602 $\pm$ 0.207 <sup>#</sup>           | 0.776 $\pm$ 0.252          |
| <b>TGF<math>\beta</math>, OD</b>    | 0.279 $\pm$ 0.065          | 0.187 $\pm$ 0.053              | 0.155 $\pm$ 0.012          | 0.091 $\pm$ 0.034 <sup>#</sup>          | 0.198 $\pm$ 0.074                       | 0.205 $\pm$ 0.099 <sup>‡</sup>           | 0.049 $\pm$ 0.009          |
| <b>Insulin, ng/ml</b>               | 1.223 $\pm$ 0.187<br>n = 4 | 1.92 $\pm$ 0.346<br>n = 4      | 0.937 $\pm$ 0.298          | 1.055 $\pm$ 0.185                       | 0.888 $\pm$ 0.181                       | 1.133 $\pm$ 0.269                        | 1.418 $\pm$ 0.486<br>n = 3 |

# Different from LF; § different from ED4; \* different from ED8; † different from ED26; ‡ different from LF26

For STED, LTED, and LF26 n = 6, 9, 9, respectively, unless otherwise stated.
